# 1 **Brain state and cortical layer-specific mechanisms underlying** 2 **perception at threshold**

3 Mitchell P. Morton<sup>1,2</sup>, Sachira Denagamage<sup>1,2</sup>, Isabel J. Blume<sup>1</sup>, John H. Reynolds<sup>4</sup>,  
4 Monika P. Jadi<sup>1,2,3</sup> and Anirvan S. Nandy<sup>1,2</sup>

5 <sup>1</sup>Department of Neuroscience, Yale University, New Haven, CT 06511

6 <sup>2</sup>Interdepartmental Neuroscience Program, Yale University, New Haven, CT 06511

7 <sup>3</sup>Department of Psychiatry, Yale University, New Haven, CT 06511

8 <sup>4</sup>Systems Neurobiology Laboratories, The Salk Institute for Biological Studies, La Jolla,  
9 CA 92037

10 **Correspondence:** [anirvan.nandy@yale.edu](mailto:anirvan.nandy@yale.edu)

## 11 **ABSTRACT**

12 Identical stimuli can be perceived or go unnoticed across successive presentations,  
13 producing divergent behavioral readouts despite similarities in sensory input. We  
14 hypothesized that fluctuations in neurophysiological states in the sensory neocortex,  
15 which could alter cortical processing at the level of neural subpopulations, underlies this  
16 perceptual variability. We analyzed cortical layer-specific electrophysiological activity in  
17 visual area V4 during a cued attention task. We find that hit trials are characterized by a  
18 larger pupil diameter and lower incidence of microsaccades, indicative of a behavioral  
19 state with increased arousal and perceptual stability. Target stimuli presented at  
20 perceptual threshold evoke elevated multi-unit activity in V4 neurons in hit trials compared  
21 to miss trials, across all cortical layers. Putative excitatory and inhibitory neurons are  
22 strongly positively modulated in the input (IV) and deep (V & VI) layers of the cortex during  
23 hit trials. Excitatory neurons in the superficial cortical layers exhibit lower variability in hit  
24 trials. Deep layer neurons are less phase-locked to low frequency rhythms in hits. Hits  
25 are also characterized by greater interlaminar coherence between the superficial and  
26 deep layers in the pre-stimulus period, and a complementary pattern between the input  
27 layer and both the superficial and deep layers in the stimulus-evoked period. Taken  
28 together, these results indicate that a state of elevated levels of arousal and perceptual

29 stability allow enhanced processing of sensory stimuli, which contributes to hits at  
30 perceptual threshold.

## 31 **INTRODUCTION**

32 Physical properties of stimuli strongly influence perception. Low intensity stimuli are  
33 detected infrequently. As intensity increases, detection probability remains low until some  
34 perceptual threshold is crossed, after which stimuli are perceived robustly. A  
35 psychometric function (Prins and Kingdom, 2018; Watson, 1979; Wichmann and Hill,  
36 2001) mathematically describes this property of perception. Only within a narrow range  
37 around the perceptual threshold do stimuli lead to significant trial-to-trial perceptual  
38 variance. While many studies present stimuli at threshold (Herman et al., 2017; Levitt,  
39 1971; Pins and ffytche, 2003; Ress and Heeger, 2003), few have probed the cortical  
40 microcircuit mechanisms that underlie successful or unsuccessful perception under these  
41 conditions (McCormick et al., 2020; van Vugt et al., 2018).

42 Prior studies have characterized how perceived stimuli trigger stronger information  
43 propagation from earlier visual areas to higher order visual and frontal regions (Herman  
44 et al., 2017; van Vugt et al., 2018). Information propagation and sensory processing are  
45 strongly influenced by brain states such as arousal and attention (Harris and Thiele, 2011;  
46 McCormick et al., 2020). Arousal has long been known to modulate cortical activity  
47 (Livingstone and Hubel, 1981; McCormick and Bal, 1997) and impact behavioral  
48 performance on a variety of sensory tasks (Aston-Jones and Cohen, 2005; McGinley et  
49 al., 2015; Yerkes and Dodson, 1908). Activity in visual area V4, a critical intermediate  
50 region in the ventral visual processing stream (Goodale and Milner, 1992; Mountcastle,  
51 1997; Roe et al., 2012) is known to be strongly modulated by attention (Desimone and  
52 Duncan, 1995; McAdams and Maunsell, 1999; Moran and Desimone, 1985; Reynolds et  
53 al., 2000). Attention enhances the firing rates of V4 neurons, increases the reliability in  
54 firing of individual neurons, and decreases correlated fluctuations among pairs of neurons

55 (Cohen and Maunsell, 2009; McAdams and Maunsell, 1999; Mitchell et al., 2007, 2009).

56         The visual cortex has a columnar architecture, in which multiple cell classes  
57 (Connors and Gutnick, 1990; Markram et al., 2004; Migliore and Shepherd, 2005;  
58 Wonders and Anderson, 2006; Zeng and Sanes, 2017) across the cortical layers  
59 (Douglas and Martin, 2004; Mountcastle, 1997) form distinct sub-populations. These sub-  
60 populations form a canonical microcircuit that orchestrates the encoding and flow of  
61 information (Douglas and Martin, 2007; Hirsch and Martinez, 2006). These sub-  
62 populations contribute uniquely to sensory processing and are differentially modulated by  
63 brain states (McCormick et al., 1985; Mitchell et al., 2007; Nandy et al., 2017; Pettine et  
64 al., 2019). However, the role of these subpopulations in sensory processing at perceptual  
65 threshold remain poorly understood. Moreover, the influence of brain states, that may be  
66 responsible for different outcomes at threshold, on these sub-populations has not been  
67 studied in detail.

68         Here we examine the neural mechanisms that regulate perception at threshold.  
69 We specifically focus on the columnar microcircuit mechanisms within area V4. We  
70 hypothesized that minor fluctuations in behavioral state, such as arousal and perceptual  
71 stability, influence the activity of neural sub-populations within the visual cortex, and  
72 thereby result in different perceptual outcomes at threshold.

73

## 74 **RESULTS**

75 To study the neural dynamics responsible for determining whether a stimulus presented  
76 at perceptual threshold is perceived, we analyzed behavioral and cortical layer-specific  
77 neural data from area V4, collected while monkeys performed a cued attention task

78 (Nandy et al., 2017). Monkeys were trained to detect an orientation change in one of two  
79 Gabor stimuli that were presented concurrently at two spatial locations, and to report  
80 having seen the change by making an eye movement to the changed stimulus. Prior to a  
81 block of trials, monkeys were cued as to which of the two spatial locations was likely to  
82 undergo the orientation change (95% valid cue). During a trial, “non-target” stimuli at a  
83 fixed reference orientation were repeatedly presented. Non-targets were turned on for  
84 200ms at the two spatial locations, and then turned off for a variable interval (200-400ms).  
85 At a random time (1-5s, mean 3s) a “target” stimulus, differing in orientation from the non-  
86 targets, was presented at one of the locations. If the monkey reported having detected  
87 the orientation change by making an eye movement to the location of the changed  
88 stimulus, it received a juice reward (Figure 1A, “hit” trial). If the monkey failed to detect  
89 the orientation change and instead continued to maintain fixation on the center of the  
90 monitor it was not rewarded (Figure 1A, “miss” trial). In this study, we focused exclusively  
91 on trials in which the target stimulus was presented at the cued location (95% of trials).

92 On each trial, the magnitude of the orientation change was drawn from a  
93 distribution that spanned multiple levels of difficulty. We fit the behavioral data with a  
94 logistic function (Prins and Kingdom, 2018) and defined the threshold condition as the  
95 orientation change that was closest to the 50% threshold of the fitted psychometric  
96 function for that session (Figure 1B, Experimental Procedures). We selected this subset  
97 of trials for further analysis, since the constant target stimuli in these trials were equally  
98 likely to be perceived or not perceived.

99 While monkeys performed this task, single- and multi-unit activity and local field  
100 potentials (LFPs) were recorded in area V4 using 16-channel linear array electrodes

101 (Plexon inc., Figure S1A-E). The array was inserted perpendicular to the cortical surface  
102 and spanned the cortical layers. We used current source density (CSD) analysis  
103 (Mitzdorf, 1985) to estimate the boundaries between the superficial (I-III), input (IV), and  
104 deep (V-VI) cortical layers (Figure S1E-F), and assign individual neurons their layer  
105 identity (Mitchell et al., 2007; Nandy et al., 2017). Single units were classified as either  
106 broad-spiking (putative excitatory neurons) or narrow-spiking (putative inhibitory neurons)  
107 on the basis of their waveform width (peak to trough duration; Figure S1D; see  
108 Experimental Procedures; Connors and Gutnick, 1990; Kawaguchi, 1993; McCormick et  
109 al., 1985; Nandy et al., 2017; Nowak et al., 2003). Eye position and pupil diameter were  
110 also recorded (ISCAN ETL-200).

111 To assess the behavioral impact of variations in arousal and perceptual stability  
112 across trials and the threshold condition, we compared pupil diameter and microsaccade  
113 incidence across trial outcomes. Larger pupil diameter is thought to be a proxy for  
114 elevated alertness and arousal (Aston-Jones and Cohen, 2005; Beatty and Lucero-  
115 Wagoner, 2000; Hess and Polt, 1964; McCormick et al., 2020; McGinley et al., 2015;  
116 Reimer et al., 2014; Tang and Higley, 2020). We found that hit trials were associated with  
117 larger pupil diameters compared to miss trials, both before and during stimulus  
118 presentations (Figure 2A). We quantified this difference in the estimation statistics  
119 framework (Calin-Jageman and Cumming, 2019; Ho et al., 2019) by comparing effect  
120 sizes and using bootstrapping to estimate uncertainty in the differences. We found that  
121 the mean of the distribution of pupil diameters associated with hit trials is greater than  
122 that associated with misses (Figure 2B; complementary null hypothesis testing results in  
123 Table 1). In both hit and miss trials, the mean pupil diameter was close to the optimal

124 arousal state for perceptual performance (Figure 2C; McGinley et al., 2015). Our results  
125 suggest that hits are more likely to occur during periods of greater arousal.

126       Microsaccades, small fixational eye movements of  $<1^\circ$  in amplitude that occur  
127 during normal fixation, are associated with periods of decreased perceptual stability  
128 (Dicke et al., 2008; Zuber and Stark, 1966). Microsaccades have been linked to  
129 suppressed neural responses in visual areas during perceptual tasks, impairing fine visual  
130 discrimination and behavioral performance (Beeler, 1967; Hafed and Krauzlis, 2010). We  
131 grouped trials in the threshold condition based on whether a microsaccade occurred in a  
132 400ms window preceding the onset of the target stimulus. Most trials with a pre-target  
133 microsaccade were misses, whereas the majority of trials without a microsaccade in this  
134 window were hits (Figure 2D;  $\chi^2$  proportion test,  $p < 0.001$ ). Consistent with previous  
135 reports (Lowet et al., 2018) we also find that microsaccades toward the attended stimulus  
136 were overrepresented in correct trials (Figure S2A, upper left). Conversely,  
137 microsaccades towards the attended stimulus were underrepresented in incorrect trials  
138 (Figure S2A, lower left). There was a very low but statistically significant negative  
139 correlation between pupil diameter and microsaccade rate (Figure S2B,  $r^2 = 0.006$ ,  $p <$   
140  $0.001$ ). Overall, these results suggest that successful trials at threshold are significantly  
141 more likely to occur during a state of greater arousal and perceptual stability.

142       Having established that hit trials are more likely to occur in states of elevated  
143 arousal and perceptual stability, we investigated whether hits are characterized by  
144 differential information processing in V4. Elevated stimulus-evoked firing rates in hits  
145 would indicate a stronger representation of the stimulus that could be necessary for  
146 accurate discrimination. We compared the firing rates of all neurons (single and multi-

147 units) recorded in each cortical layer across hit and miss trials. For non-target stimuli,  
148 firing rates were equivalent for hits and misses in both the pre-stimulus (0-200ms before  
149 stimulus onset) and stimulus-evoked (60-260ms following stimulus onset) periods (Figure  
150 3A). For the target stimulus, firing rates were once again equivalent in the pre-stimulus  
151 period, but hit trials were characterized by elevated firing across cortical layers in the  
152 stimulus-evoked period (Figure 3B-C). Broad and narrow-spiking neurons in both the  
153 input and deep layers respond more to target stimuli in hit trials, and trend towards  
154 elevated firing rates in the superficial layers during hits (Figure 3D). The average firing  
155 rate in response to target stimuli for each neuron is shown in Figure S3 for both hit and  
156 miss trials.

157         Variability in response reflects how reliably information is encoded by a neural  
158 population. Lower baseline variability can enhance the ability of neurons to encode  
159 stimulus differences. We calculated the Fano factor, a mean-normalized measure of trial-  
160 to-trial variability in firing, for single-units in our population (Figure 4A). We find that broad-  
161 spiking units in the superficial layer exhibited lower Fano factor during the pre-stimulus  
162 period in hit trials (0-60ms before stimulus onset, Figure 4B), indicating this population of  
163 neurons fired more reliably when the animal correctly detected the orientation change.  
164 This was not the case for broad-spiking neurons in other layers (Figure 4B) or narrow-  
165 spiking neurons (data not shown).

166         We next wanted to test how the relationship between spiking activity and LFPs  
167 may differ across hits and misses. Spike-LFP synchrony can reflect cortical processing  
168 and both within- and inter-areal coordination (Fries, 2009; Fries et al., 2008; Siapas et al.,  
169 2005). We calculated the PPC (Vinck et al., 2010), a frequency resolved measure of



170 spike-LFP phase-locking, for single and multi-units relative to their local LFP signal during  
171 the pre-stimulus period (0-200ms before stimulus onset, Figure 5A). We averaged PPC  
172 values at low (3-12Hz), medium (15-25Hz), and high (30-80Hz) frequency bands  
173 (superficial & Input: Figure S4A-B; deep: Figure 5B & S4C). Deep layer neurons exhibit  
174 reduced low-frequency phase-locking in hit trials than in misses (Figure 5B), suggesting  
175 an improvement in pooled signal-to-noise among this neural population.

176 Our results at the individual neuron or neural-subpopulation levels suggest  
177 enhanced processing of perceived stimuli. However, it is the concerted activity among  
178 neural sub-populations that ultimately determine information flow through the laminar  
179 cortical circuit. We therefore examined differences in interlaminar synchrony as  
180 signatures of differential information flow between hit and miss trials. Spike-spike  
181 coherence (SSC) is a frequency resolved measure of the degree to which two spike trains  
182 fluctuate together (Mitchell et al., 2009; Mitra and Pesaran, 1999). We measured  
183 interlaminar SSC for spike trains from pairs of cortical layers, each spike train being  
184 comprised of all recorded action potentials in a given layer (See Experimental  
185 Procedures). We computed interlaminar SSC separately for hit and miss trials in both the  
186 pre-stimulus (0-200ms before stimulus onset, Figure 6A) and stimulus-evoked (60-260ms  
187 after stimulus onset, Figure 7A) periods. We averaged SSC for each pair of layers across  
188 three frequency bands, 3-12Hz, 15-25Hz, and 30-80Hz (Figure 6B and 7B).

189 Overall, hit trials have greater interlaminar SSC in hits compared to misses at  
190 almost all frequencies (Figure 6B and 7B). In the pre-stimulus period, the strongest SSC  
191 difference between hits and misses was observed between the superficial and deep  
192 layers across all frequencies (Figure 6B, middle panel). This implies greater synchrony of

193 the output layers of the cortex during hit trials. In contrast, this pattern was the opposite  
194 in the stimulus-evoked period, with greater SSC differences being found in pairs that  
195 involve the input layer (Figure 7B, top and bottom). This may reflect a higher degree of  
196 stimulus-driven feed-forward information propagation during hit trials. When comparing  
197 across time (pre-stimulus vs stimulus-evoked), layers, and frequency band, there was a  
198 significant interaction effect of layer pair and time window (three-way ANOVA,  $p =$   
199 0.0075).

200 Finally, we sought to compare the predictive power of our results on the monkey's  
201 perceptual performance. We created a generalized linear model (GLM) to regress  
202 behavioral outcome from the pupil diameter, number of microsaccades in the pre-target  
203 window, and average target-evoked multi-unit firing rate in each of the three layers (see  
204 Experimental Procedures; Davis et al., 2020). Other reported measures (Fano factor,  
205 PPC, interlaminar SSC) that we could not estimate reliably on a single trial basis were not  
206 considered in the GLM analysis. Pre-target microsaccades were by far the strongest  
207 predictor of performance ( $weight = -1.3116$ ;  $p = 6.0757e - 08$ ). Input layer firing rate  
208 also significantly predicted perception ( $weight = 0.3276$ ;  $p = 0.020068$ ). Superficial  
209 firing rate, deep firing rate, and pupil diameter were not significant predictors (Table 2, all  
210  $p > 0.5$ ). This indicates that perceptual stability in the pre-target window is critical for  
211 behavioral performance, and elevated firing in the input layer is the most reliable  
212 physiological signature of a perceived stimulus.

## 213 **DISCUSSION**

214 We investigated the physiological processes responsible for variable behavioral  
215 outcomes at perceptual threshold. Controlling for *both* the attentive instruction (thus

216 minimizing large-scale attentional effects) and the stimulus condition that elicited  
217 performance at a threshold level allowed us to examine the physiological and neural  
218 correlates that underlie correct versus incorrect behavioral outcomes. We found multiple  
219 lines of evidence which suggest that a state of higher arousal and perceptual stability and  
220 the accompanying enhanced processing of visual stimuli contributes to accurate  
221 perception in hit trials.

222 Pupil diameter is elevated in hit trials (Figure 2A-C), and prior studies have shown  
223 that pupil diameter is strongly linked to arousal and alertness (Beatty and Lucero-  
224 Wagoner, 2000; Hess and Polt, 1964; Tang and Higley, 2020). This provides evidence  
225 that a state of higher arousal may contribute to improved sensory processing. The much  
226 lower hit rate in trials with a microsaccade preceding the target (Figure 2D) and our GLM  
227 analysis shows that perceptual stability is critical for accurate discrimination at threshold.  
228 It is unlikely that these two measures are reflecting the same phenomenon, as there is a  
229 very weak correlation between them over the course of a trial (Figure S2B).

230 There is a strong link between oculomotor control and attentional deployment  
231 (Moore and Fallah, 2001; Moore and Zirnsak, 2017; Schafer and Moore, 2011), and  
232 recent evidence suggests that microsaccades directed towards a target stimulus reflect  
233 attention-related processing and performance (Lowet et al., 2018). In our dataset, during  
234 the pre-target period, microsaccades towards the attended stimulus were  
235 overrepresented in correct trials (Figure S2A, upper left). Conversely, microsaccades  
236 towards the attended stimulus were underrepresented in incorrect trials (Figure S2A,  
237 lower left). Microsaccades directed towards the location of the eventual target may reflect  
238 elevated attentional deployment that can compensate for the perceptual instability due to

239 higher incidence of microsaccades.

240 Our electrophysiological findings associated with hit trials for threshold stimuli,  
241 *within* a cued attention state, mirror several previous findings that are associated with the  
242 deployment of covert spatial attention. Attention has long been known to increase firing  
243 rates in V4 (McAdams and Maunsell, 1999; Mitchell et al., 2007; Spitzer et al., 1988), and  
244 there is recent evidence that this increase occurs in all cortical layers in V4 (Nandy et al.,  
245 2017). We find that elevated firing rates in hits occur across all layers in conjunction with  
246 elevated arousal (Figure 3). Attention reduces the variability in the firing of V4 neurons,  
247 and this reduction is thought to contribute to the improved information coding capacity of  
248 a population of neurons (Cohen and Maunsell, 2009; Mitchell et al., 2007, 2009; Moreno-  
249 Bote et al., 2014; Nandy et al., 2017). The reduction in Fano factor among broad-spiking  
250 superficial-layer neurons in hit trials mirrors the effects of attention. Since these neurons  
251 are putative projection neurons to downstream cortical areas, this reduction in Fano factor  
252 may indicate increased reliability in stimulus encoding that could contribute to hits. Our  
253 finding is also in agreement with previous reports of higher variability in representations  
254 of unperceived stimuli in humans (Schurger et al., 2010). Synchronous neural activity  
255 appears to modulate perceptual and cognitive ability in a variety of contexts (Abbas et al.,  
256 2018; Fries et al., 2001; Rohenkohl et al., 2018; Worden et al., 2000). We found that  
257 deep-layer neurons exhibit less low-frequency phase-locking in hit trials (Figure 5). This  
258 is consistent with prior studies that find an attention-mediated reduction in the power  
259 spectrum of the spike-triggered-averaged LFP (Fries et al., 2001).

260 Our examination of inter-laminar synchrony revealed two interesting and  
261 complementary patterns: hits were associated with greater coherence between the

262 superficial and deep layers during spontaneous activity in the pre-stimulus period (Figure  
263 6); in contrast, we found enhanced coherence between the input layer and both the output  
264 layers (superficial and deep) in the stimulus-evoked period during hits (Figure 7).  
265 Increased superficial-deep coherence in the pre-stimulus period could be the result of  
266 neuromodulatory or top-down processes that maintain the cortex in a state of sustained  
267 depolarization corresponding to a state of higher arousal during hits (McCormick et al.,  
268 2020; McGinley et al., 2015). Increased synchrony between the input layer and the output  
269 layers during the stimulus-evoked period could then reflect stronger information  
270 propagation through the cortical circuit, and hence with improved stimulus detection  
271 (Marshel et al., 2019). In contrast to broad global synchrony or local correlated  
272 fluctuations, which may signal a default state of minimal processing or decreased  
273 information coding capacity (Mitchell et al., 2009; Steriade et al., 1993; von Krosigk et al.,  
274 1993; Zohary et al., 1994), these patterns of interlaminar coherence that we found  
275 suggest that successful perception at threshold is mediated by pathway specific  
276 modulation of information flow through the laminar cortical circuit.

277         Several studies have examined how information flow differs for perceived and  
278 unperceived stimuli at a more macroscopic scale (Herman et al., 2017; van Vugt et al.,  
279 2018). van Vugt et al. (2018) recorded from three brain regions, V1, V4, and dorsolateral  
280 prefrontal cortex (dlPFC), while a monkey performed a stimulus detection task at  
281 threshold. Their work supports the model that feedforward propagation of sensory  
282 information from the visual cortex to the PFC causes a non-linear “ignition” of association  
283 areas resulting in conscious perception (Dehaene and Changeux, 2011). Herman et al.  
284 (Herman et al., 2017). found that conscious human perception triggers a wave of activity

285 propagation from occipital to frontal cortex while switching off default mode and other  
286 networks. Our study provides insight into the functions of the cortical microcircuit at the  
287 columnar level that could reflect these large-scale sweeping activity changes in  
288 perception.

289 Overall, we identified substantial layer-specific differences in cortical activity  
290 between hits and misses at perceptual threshold, during both the pre-stimulus and  
291 stimulus-evoked periods (Figure 8). These differences are indicative of greater fidelity of  
292 stimulus processing in hits, likely as a result of elevated arousal and perceptual stability.  
293 Synchrony analysis reveals a potential higher state of anticipatory engagement in the pre-  
294 stimulus period followed by improved signal propagation after stimulus presentation.  
295 These physiological differences in the laminar microcircuit likely contribute to successful  
296 perceptual discrimination at threshold.

## 297 **EXPERIMENTAL PROCEDURES**

### 298 **Surgical Procedures**

299 Surgical procedures have been described in detail previously (Nandy et al., 2017; Nassi  
300 et al., 2015; Ruiz et al., 2013). In brief, an MRI compatible low-profile titanium chamber  
301 was placed over the pre-lunate gyrus, on the basis of preoperative MRI in two rhesus  
302 macaques (right hemisphere in Monkey A, left hemisphere in Monkey C). The native dura  
303 mater was then removed, and a silicone based optically clear artificial dura (AD) was  
304 inserted, resulting in an optical window over dorsal V4 (Figure S1A, B). All procedures  
305 were approved by the Institutional Animal Care and Use Committee and conformed to  
306 NIH guidelines.

307

## 308 **Electrophysiology**

309 At the beginning of each recording session a plastic insert, with an opening for targeting  
310 electrodes, was lowered into the chamber and secured. This served to stabilize the  
311 recording site against cardiac pulsations. Neurons were recorded from cortical columns  
312 in dorsal V4 using 16-channel linear array electrodes ('laminar probes', Plexon Inc.,  
313 Plexon V-probe). The laminar probes were mounted on adjustable X-Y stages attached  
314 to the recording chamber and positioned over the center of the pre-lunate gyrus under  
315 visual guidance through a microscope (Zeiss Inc., Figure S1C). This ensured that the  
316 probes were maximally perpendicular to the surface of the cortex and thus had the best  
317 possible trajectory to make a perpendicular penetration down a cortical column. Across  
318 recording sessions, the probes were positioned over different sites along the center of the  
319 gyrus in the parafoveal region of V4 with receptive field (RF) eccentricities between 2 and  
320 7 degrees of visual angle. Care was taken to target cortical sites with no surface micro-  
321 vasculature, with surface micro-vasculature used as reference so that the same cortical  
322 site was not targeted across recording sessions. The probes were advanced using a  
323 hydraulic microdrive (Narishige Inc.) to first penetrate the AD and then through the cortex  
324 under microscopic visual guidance. Probes were advanced until the point that the top-  
325 most electrode (toward the pial surface) registered local field potential (LFP) signals. At  
326 this point, the probe was retracted by about 100-200  $\mu\text{m}$  to ease the dimpling of the cortex  
327 due to the penetration. This procedure greatly increased the stability of the recordings  
328 and increased the neuronal yield in the superficial electrodes.

329 The distance from the tip of the probes to the first electrode contact was either 300  
330  $\mu\text{m}$  or 700  $\mu\text{m}$ . The inter-electrode distance was 150  $\mu\text{m}$ , thus minimizing the possibility

331 of recording the same neural spikes in adjacent recording channels. Electrical signals  
332 were recorded extracellularly from each channel. These were then amplified, digitized  
333 and filtered either between 0.5 Hz and 2.2 kHz (LFPs) or between 250 Hz and 8 kHz  
334 (spikes) and stored using the Multichannel Acquisition Processor system (MAP system,  
335 Plexon Inc.). Spikes and LFPs were sampled at 40 and 10 kHz respectively. LFP signals  
336 were further low-pass filtered with a 6<sup>th</sup> order Butterworth filter with 300Hz cut-off and  
337 down-sampled to 1 kHz for further analysis. Spikes were classified as either multi-unit  
338 clusters or isolated single units using the Plexon Offline Sorter software program. Single  
339 units were identified based on two criteria: (a) if they formed an identifiable cluster,  
340 separate from noise and other units, when projected into the principal components of  
341 waveforms recorded on that electrode and (b) if the inter-spike interval (ISI) distribution  
342 had a well-defined refractory period. Single-units were classified as either narrow-spiking  
343 (putative interneurons) or broad-spiking (putative pyramidal cells) based on methods  
344 described in detail previously (Mitchell et al., 2007; Nandy et al., 2017). Specifically, only  
345 units with waveforms having a clearly defined peak *preceded* by a trough were potential  
346 candidates. The distribution of trough-to-peak duration was clearly bimodal (Hartigan's  
347 Dip Test,  $p = 0.012$ ) (Hartigan and Hartigan, 1985). Units with trough-to-peak duration  
348 less than 225  $\mu$ s were classified as narrow-spiking units; units with trough-to-peak  
349 duration greater than 225  $\mu$ s were classified as broad-spiking units (Figure S1D;  
350 gray=narrow, black=broad).

351 Data was collected over 32 sessions (23 sessions in Monkey A, 9 in Monkey C),  
352 yielding a total of 413 single units (146 narrow-spiking, 267 broad-spiking) and 296 multi-  
353 unit clusters. Per session unit yield was considerably higher in Monkey C compared to



354 Monkey A, resulting in a roughly equal contribution of both monkeys toward the population  
355 data.

356

### 357 **Task, Stimuli and Inclusion Criteria**

358 Stimuli were presented on a computer monitor placed 57 cm from the eye. Eye position  
359 was continuously monitored with an infrared eye tracking system (ISCAN ETL-200). Trials  
360 were aborted if eye position deviated more than 1° (degree of visual angle, 'dva') from  
361 fixation. Experimental control was handled by NIMH Cortex software  
362 (<http://www.cortex.salk.edu/>). Eye-position (all sessions) and pupil diameter (18/32  
363 sessions) data were concurrently recorded and stored using the MAP system.

364 *Receptive Field Mapping:* At the beginning of each recording session, neuronal  
365 RFs were mapped using subspace reverse correlation in which Gabor (eight orientations,  
366 80% luminance contrast, spatial frequency 1.2 cycles/degree, Gaussian half-width 2°) or  
367 ring stimuli (80% luminance contrast) appeared at 60 Hz while the monkeys maintained  
368 fixation. Each stimulus appeared at a random location selected from an 11x11 grid with  
369 1° spacing in the appropriate visual quadrant. Spatial receptive maps were obtained by  
370 applying reverse correlation to the evoked local field potential (LFP) signal at each  
371 recording site. For each spatial location in the 11x11 grid, we calculated the time-  
372 averaged power in the stimulus evoked LFP (0-200ms after each stimulus flash) at each  
373 recording site. The resulting spatial map of LFP power was taken as the spatial RF at the  
374 recording site. For the purpose of visualization, the spatial RF maps were smoothed using  
375 spline interpolation and displayed as stacked contours plots of the smoothed maps

376 (Figure S1G). All RFs were in the lower visual quadrant (lower-left in Monkey A, lower-  
377 right in Monkey C) and with eccentricities between 2 and 7 dva.

378 *Current Source Density Mapping:* In order to estimate the laminar identity of each  
379 recording channel, we used a current source-density (CSD) mapping procedure (Mitzdorf,  
380 1985). Monkeys maintained fixation while 100% luminance contrast ring stimuli were  
381 flashed (30ms) centered at the estimated RF overlap region across all channels. The size  
382 of the ring was scaled to about three-quarters of the estimated diameter of the RF. CSD  
383 was calculated as the second spatial derivative of the flash-triggered LFPs (Figure S1E).  
384 The resulting time-varying traces of current across the cortical layers can be visualized  
385 as CSD maps (Figure S1F; maps have been spatially smoothed with a Gaussian kernel  
386 for aid in visualization). Red regions depict current sinks in the corresponding region of  
387 the cortical laminae; blue regions depict current sources. The input layer (Layer 4) was  
388 identified as the first current sink followed by a reversal to current source. The superficial  
389 (Layers 1-3) and deep (Layers 5-6) layers had opposite sink-source patterns. LFPs and  
390 spikes from the corresponding recording channels were then assigned to one of three  
391 layers: superficial, input or deep.

392 *Attention task:* In the main experiment, monkeys had to perform an attention-  
393 demanding orientation change-detection task (Figure 1A). While the monkey maintained  
394 fixation, two achromatic Gabor stimuli (orientation optimized per recording session,  
395 spatial frequency 1.2 cycles/degree, 6 contrasts randomly chosen from a uniform  
396 distribution of luminance contrasts,  $c = [10, 18, 26, 34, 42, 50\%]$ ) were flashed on for 200  
397 ms and off for a variable period chosen from a uniform distribution between 200-400 ms.  
398 One of the Gabors was flashed at the receptive field overlap region, the other at a location

399 of equal eccentricity across the vertical meridian. At the beginning of a block of trials, the  
400 monkey was spatially cued ('instruction trials') to covertly attend to one of these two  
401 spatial locations. During these instruction trials, the stimuli were only flashed at the  
402 spatially cued location. At an unpredictable time drawn from a truncated exponential  
403 distribution (minimum 1 s, maximum 5 s, mean 3 s), one of the two stimuli changed in  
404 orientation. The monkey was rewarded for making a saccade to the location of orientation  
405 change. The monkey was rewarded for only those saccades where the saccade onset  
406 time was within a window of 100-400 ms after the onset of the orientation change. The  
407 orientation change occurred at the cued location with 95% probability and at the uncued  
408 location with 5% probability ('foil trials'). We controlled task difficulty by varying the degree  
409 of orientation change ( $\Delta_{\text{ori}}$ ), which was randomly chosen from one of the following: 1, 2,  
410 3, 4, 6, 8, 10 and 12°. The orientation change in the foil trials was fixed at 4°. These foil  
411 trials allowed us to assess the extent to which the monkey was using the spatial cue, with  
412 the expectation that there would be an impairment in performance and slower reaction  
413 times compared to the case in which the change occurred at the cued location. If no  
414 change occurred before 5s, the monkey was rewarded for maintaining fixation ('catch  
415 trials', 13% of trials). We refer to all stimuli at the baseline orientation as 'non-targets' and  
416 the stimulus flash with the orientation change as the 'target'.

417 *Inclusion criteria:* Of the 413 single units, we included only a subset of neurons  
418 that were visually responsive for further analysis. For each neuron we calculated its  
419 baseline firing-rate for each attention condition (attend into RF ['attend-in' or 'IN'], attend  
420 away from RF ['attend-away' or 'AWAY']) from a 200ms window before a stimulus flash.  
421 We also calculated the neuron's contrast response function for both attention conditions

422 (Figure S1H). This was calculated as the firing rate over a window between 60-200 ms  
423 after stimulus onset and averaged across all stimulus flashes (restricted to non-targets)  
424 of a particular contrast separately for each attention condition. A neuron was considered  
425 visually responsive if any part of the contrast response curves exceeded the baseline rate  
426 by 4 standard deviations for both attention conditions. This left us with 274 single units  
427 (84 narrow-spiking, 190 broad-spiking) and 217 multi-unit clusters for further analysis.

428

## 429 **Data analysis**

430 *Behavioral Analysis:* For each orientation change condition  $\Delta_{\text{ori}}$ , we calculated the  
431 hit rate as the ratio of the number of trials in which the monkey correctly identified the  
432 target by making a saccadic eye-movement to the location of the target over the number  
433 of trials in which the target was presented. The hit rate as a function of  $\Delta_{\text{ori}}$ , yields a  
434 behavioral psychometric function (Figure 1B). We performed this analysis independently  
435 for each recording day for each monkey, yielding a similar but distinct psychometric  
436 function for every session. Psychometric functions were fitted with a smooth logistic  
437 function (Prins and Kingdom, 2018). Error bars were obtained by a jackknife procedure  
438 (20 jackknives, 5% of trials left out for each jackknife). Performance for the foil trials were  
439 calculated similarly as the hit rate for trials in which the orientation change occurred at the  
440 un-cued location (Figure 1B, square symbol). For each fitted psychometric function in  
441 both the attend-in and attend-away conditions, we calculated the threshold of the fitted  
442 logistic function (i.e. the  $\Delta_{\text{ori}}$  at which performance was mid-way between the lower and  
443 upper asymptotes). Because the threshold of the fitted function always lies somewhere  
444 on the axis of  $\Delta_{\text{ori}}$ , but not exactly at an orientation change presented to the subject, we

445 then defined the threshold condition as the subset of trials in which the orientation change  
446 of the target stimulus was closest to the threshold of the fitted function (Figure 1B). We  
447 restricted further analysis to this threshold condition. For this threshold condition we  
448 identified the trials in which the monkey correctly identified the target as 'hit' trials and  
449 those in which the monkey failed to identify the target as 'miss' trials. Analysis of behavior,  
450 pupil diameter, and microsaccades was conducted on both the attend-in and attend-away  
451 conditions; all electrophysiological analysis was applied only to the attend-in condition.

452 *Pupil Diameter.* The raw pupil diameter measurements from the infrared eye-  
453 tracking system could differ across days due to external factors such as display monitor  
454 illumination. To control for this, we normalized the raw data by a Z-score procedure  
455 separately for each session (using the mean and standard deviation of all measurements  
456 during the session). We analyzed normalized pupil diameter traces for hit and miss trials  
457 in the threshold condition, over a time window from 100 ms before to 100 ms after all  
458 stimulus presentations, excluding the first stimulus presentation in a trial. The first  
459 stimulus was excluded to avoid pupil diameter changes due to the pupillary near response  
460 caused by acquiring fixation (McDougal and Gamlin, 2015). The pupil diameter was  
461 averaged over this time period and compared across conditions using bootstrap  
462 estimation and *t*-test. Distribution violin plots were generated using kernel density  
463 estimation (Hoffmann, 2015) (bandwidth(hit) = 0.0801, bandwidth(miss) = 0.0648).

464 *Microsaccade Analysis:* Saccadic eye-movements were detected using ClusterFix  
465 (König and Buffalo, 2014). We identified microsaccades by filtering for eye movements  
466 with amplitudes between 0.1 and 1 degree of visual angle. We then split all trials in the  
467 threshold condition into two groups: those in which a microsaccade was detected in the

468 400ms preceding the target stimulus presentation, and those without a detected  
469 microsaccade. We calculated the hit rate for trials within those two groups. For all trials in  
470 which a target stimulus was presented at the attended location, we determined the  
471 direction of all microsaccades in the 400ms period preceding target presentation, relative  
472 to both the attended and unattended stimuli. The relative microsaccade direction was  
473 defined as the angle between two vectors: the one defined by the eye positions at the  
474 beginning and end of the microsaccade, and the vector from the initial eye position to the  
475 center of the stimulus (calculated separately for attended and unattended stimuli).  
476 Relative microsaccade directions were grouped into 12 bins from 0-360°. The distribution  
477 of relative microsaccade directions were calculated separately for correct and incorrect  
478 trials, relative to both the attended and unattended stimuli (Figure S2A).

479 We next created a null distribution of relative microsaccade direction. This was  
480 done by pooling together microsaccades from correct and incorrect trials and then  
481 sampling with replacement from this pooled data (bootstrap procedure (Efron and  
482 Tibshirani, 1993); 1000 samples). The number of microsaccades chosen for each sample  
483 was the same as the number in correct or incorrect trials respectively. These  
484 bootstrapped samples were used to create 99.5% confidence intervals for the count of  
485 microsaccades expected in each of the 12 bins. A bin was considered significantly  
486 different from chance if it's true count fell outside this confidence interval.

487 We calculated microsaccade rate for an entire trial by dividing the total number of  
488 detected microsaccades in the whole trial by the trial length (6995 total trials). The  
489 Pearson correlation between microsaccade rate and mean normalized pupil diameter  
490 (see above) for the trial was calculated for all trials with pupil diameter data, regardless

491 of trial type or outcome (Figure S2B). Not pictured in Figure S2B but included in  
492 correlation analysis were trials with a mean normalized pupil diameter greater than 2 or  
493 less than -2 (~4% of trials). Only 4 of these trials were longer than 1 s, out of which 2 trials  
494 contained detected microsaccades.

495 *Firing Rate:* Firing rates were normalized per neuron to that neuron's maximum  
496 stimulus-evoked response to each contrast before being combined across contrasts and  
497 trial types. We averaged stimulus-evoked firing rates from 60-260 ms following non-target  
498 or target stimulus presentations. We used bootstrapped estimation to compare firing rates  
499 in hit and miss trials in a paired comparison. This was done for all single and multi-unit  
500 clusters, as well as broad- and narrow-spiking single-units in each layer. Firing rates were  
501 also compared across hit and miss trials by paired *t*-test for each group. PSTH of firing  
502 rates were calculated in 30ms bins shifted in 5ms increments.

503 *Fano factor:* Trial-to-trial variability was estimated by the Fano-factor, which is the  
504 ratio of the variance of the spike counts across trials over the mean of the spike counts.  
505 The Fano factor was calculated over non-overlapping 20ms time bins in a window from  
506 200ms prior to each non-target flash onset to 200ms after each non-target flash onset for  
507 hit and miss trials in the threshold condition. To compare across conditions, we calculated  
508 the Fano factor modulation index (MI), defined as

509 
$$MI = \frac{FF_{hit} - FF_{miss}}{FF_{hit} + FF_{miss}}$$

510 where  $FF_{hit}$  and  $FF_{miss}$  represent the Fano factor for a given unit in hit and miss trials  
511 respectively at each point in time with respect to non-target stimulus onset. For broad-  
512 spiking neurons in the superficial layer the Fano factor MI was averaged from 0-60ms

513 prior to non-target stimulus onset and compared across trial types in the threshold  
514 condition.

515 *Pairwise Phase Consistency (PPC)*: We calculated PPC (Vinck et al., 2010) for  
516 single and multi-units in the non-target pre-stimulus period (0-200ms preceding onset) in  
517 trials in the threshold condition. Although PPC is unbiased by spike count, we set a  
518 threshold of 50 spikes for analysis so that only units with enough spikes for a reliable  
519 estimate of PPC were included (superficial:  $n = 26$ , input:  $n = 41$ , deep:  $n = 64$ ). LFP  
520 phase was calculated using Morlet wavelets. PPC for each unit was calculated for the  
521 phase of the LFP recorded on the same channel and averaged in three frequency bands  
522 (3-12 Hz, 15-25 Hz, and 30-80 Hz). PPC was calculated separately for hit and miss trials  
523 and compared across trial outcomes by t-test, corrected for multiple comparisons.

524 *Spike-spike coherence (SSC)*: For each recording session, all spikes recorded  
525 from visually responsive single and multi-units in each layer were combined into a single  
526 spike train for that layer (layer multi-unit). SSC was calculated for each of the three  
527 possible pairs of layer multi-units in each session for both the pre-stimulus (0-200 ms  
528 preceding stimulus onset) and stimulus evoked period (60-260 ms following stimulus  
529 onset) separately for hit and miss trials using Chronux (NW = 1; K = 1; <http://chronux.org>)  
530 (Mitra, 2007; Mitra and Pesaran, 1999). To control for differences in firing rates across hit  
531 and miss trials we used a rate matching procedure (Mitchell et al., 2009). For estimation  
532 statistics, interlaminar SSC values was calculated for each frequency and subsequently  
533 averaged across three frequency bands: 3-12 Hz, 5-15 Hz, and 30-80 Hz and compared  
534 across hit and miss trials for each pair of layers in each recording session. For null-  
535 hypothesis testing, we calculated the SSC modulation index, defined as



536 
$$MI = \frac{SSC_{hit} - SSC_{miss}}{SSC_{hit} + SSC_{miss}}$$

537 The SSC MI was calculated for each frequency and subsequently averaged across three  
538 frequency bands: 3-12 Hz, 5-15 Hz, and 30-80 Hz. MI values for each frequency band  
539 were compared to zero by t-test, Bonferroni corrected for multiple comparisons. We  
540 tested for interaction effects with a three-factor ANOVA, with frequency, pair of layers,  
541 and time window (pre or post stimulus) as factors. We calculated a shuffled distribution of  
542 SSC by shuffling the trial identities of the spikes in one of the layers in the pair. We then  
543 calculated SSC with the shuffled trial identities. This procedure was repeated 10 times to  
544 create the shuffled distribution.

545 *GLM quantification:* To compare how well our results can predict behavioral  
546 performance we fit a GLM to the response of the monkeys in trials in the threshold  
547 condition (Davis et al., 2020). We included five regressors in our analysis: (1) average  
548 pupil diameter during the trial, (2) number of microsaccades in the pre-target window (0-  
549 400ms before target stimulus onset), and average target-evoked multi-unit firing rate in  
550 the (3) superficial, (4) input, and (5) deep layers. We calculated the average target-evoked  
551 firing rate by averaging the firing rate of all single- and multi-units in a given layer 60-  
552 260ms after target stimulus onset in each trial. In order to be able to compare weights  
553 across regressors, each regressor was transformed into a z-score before being included  
554 in the model. We fit the GLM using a logit link function, using the predictors to regress the  
555 categorical binary trial outcome (hit or miss). A total of 309 trials were included in the  
556 GLM.

557

## 558 **FIGURE LEGENDS**

### 559 **Figure 1. Orientation change detection task at perceptual threshold**

560 (A) Schematic of task structure. The monkey initiated a trial by fixating on the center of the screen. Two  
561 Gabor stimuli (represented by oriented lines) were presented for 200 ms and then turned off for 200-400ms.  
562 This was repeated until, at an unpredictable time, one of the stimuli changed orientation. The monkey could  
563 report having seen the change by making an eye movement to the location of the target stimulus to receive  
564 a reward (hit trials). If the monkey failed to report the orientation change and maintained fixation on the  
565 center of the screen it was not rewarded (miss trials). Before a block of trials, the monkey was cued as to  
566 which stimulus was likely to undergo the change (95% valid cue). In 5% of trials the orientation change  
567 occurred at the other location (foil trials). (B) Example behavioral psychometric function from one recording  
568 session and attention condition. Behavioral performance (hit rate, circles) is presented as a function of  
569 orientation change. Data was fitted with a logistic function. The threshold condition, trials with performance  
570 halfway between the upper and lower asymptotes of the logistic function, is indicated by the orange box.  
571 Error bars represent standard deviation calculated with a jackknife procedure (20 jackknives). The square  
572 symbol indicates foil trial performance.  
573

### 574 **Figure 2. Hit trials have larger pupil diameter whereas microsaccades more often precede misses**

575 (A) Normalized pupil diameter for hit and miss trials in the threshold condition. 0 ms corresponds to stimulus  
576 onset. Mean +/- s.e.m. (B) Distribution of pupil diameter values associated with hit and miss trials. Pupil  
577 diameter was averaged from 100ms before to 100ms after non-target stimulus onset. Violin plots were  
578 generated using kernel smoothing (See Experimental Procedures). Error bars represent 95% confidence  
579 intervals for the mean of each distribution, and the mean difference (blue, right axes). *Inset*: zoomed in view  
580 of the mean difference between hit and miss trials. Black bar represents a 95% confidence interval of the  
581 mean difference. Shaded region reflects the distribution of the bootstrapped estimation of the mean  
582 difference. (C) Histogram of mean pupil diameter around the time of stimulus onset (calculated as in B).  
583 Orange and gray lines represent the mean pupil diameter for hit and miss trials respectively. (D) Hit rate for  
584 trials with (*left*, 387 trials) and without (*right*, 1336 trials) a microsaccade detected in the time window 0-  
585 400ms before target onset. There is a significantly lower hit rate in trials with a microsaccade ( $p < 0.0001$ ,  
586  $\chi^2$ -test).  
587

### 588 **Figure 3. Target stimuli evoke higher firing rates in hit trials**

589 Rows correspond to different layers (top=superficial, middle=input, bottom=deep). (A) Population (single  
590 and multi-unit) non-target PSTH of visually responsive neurons for the hit (orange) and miss (dark-gray)  
591 trials in the threshold condition (mean +/- s.e.m). (B) As in A but for target stimuli. (C) Bootstrapped  
592 estimation of the paired mean difference in target stimulus-evoked firing rate across hit and miss trials in  
593 the time window 60-260ms (red dotted box in B) after target stimulus onset. Shaded regions represent the  
594 bootstrapped estimation of the paired mean difference in firing rate (hit - miss), and black lines are 95%  
595 confidence intervals. Plots include data from both single and multi-units, separated by layer (top=superficial,  
596 middle=input, bottom=deep). (D) As in C, bootstrapped estimation of the paired mean difference in firing  
597 rate for hit trials compared to miss trials in the target stimulus-evoked period, but only for single-units broken  
598 up by cell class (gold=broad, teal=narrow).  
599

### 600 **Figure 4. Broad-spiking neurons in the superficial layer have decreased variability in hit trials**

601 (A) Rows correspond to different layers (top=superficial, middle=input, bottom=deep). The Fano Factor of  
602 broad-spiking putative excitatory neurons for the hit and miss trials in the threshold condition (mean +/-  
603 s.e.m). There is a significant decrease in variability for the hit trials prior to stimulus onset only in the  
604 superficial layer. 0 ms corresponds to non-target stimulus onset. The average Fano Factor within a 60ms  
605 time-window (red dashed box) prior to stimulus onset is plotted in B. (B) *Top*: Fano Factor modulation index  
606 for each broad-spiking neurons recorded in each layer, averaged in the 60ms preceding stimulus onset.  
607 *Bottom*: Bootstrapped estimation of the mean difference of the Fano Factor modulation index from zero in  
608 each of the three layers. Colored curves represent the estimated bootstrapped distribution. Black dots and  
609 lines reflect the mean and 95% confidence intervals of the distributions.  
610

### 611 **Figure 5. Deep layer neurons are phase-locked to low-frequency rhythms in miss trials**

612 (A) Pairwise phase consistency (PPC) of single and multi-units in each layer to the local field potential (LFP)  
613 signal recorded from the same channel in hit and miss trials at threshold. PPC was calculated in the pre-  
614 pre-stimulus period (0-200 ms before stimulus onset). Dashed red line indicates a PPC of 0, below which there  
615 is no consistent relationship between spikes and LFP phase. (B) Bootstrapped estimation plot for the paired  
616 mean difference in PPC for deep layer neurons over three frequency bands: 3-12Hz, 15-25Hz, 30-80Hz.  
617 Curves represent the bootstrapped distribution for the paired difference, and black dots and vertical lines  
618 represent the mean and 95% confidence intervals for the paired mean difference  
619

#### 620 **Figure 6. Greater interlaminar coherence in hit trials in the pre-stimulus period**

621 Interlaminar spike-spike coherence in the pre-stimulus period (0-200ms prior to stimulus onset). Rows  
622 correspond to different pairs of layers (*top*=superficial-input, *middle*=superficial-deep, *bottom*=input-deep).  
623 (A) Multi-unit interlaminar spike-spike coherence (SSC) calculated in the 200ms before non-target stimulus  
624 onset in hit and miss trials (solid lines, mean +/- s.e.m). Firing rates were matched across hit and miss trials.  
625 Dashed lines represent coherence calculated with shuffled trial identities (mean +/- s.e.m). (B)  
626 Bootstrapped estimation plot for the paired mean difference in SSC for each pair of layers averaged over  
627 three frequency bands : 3-12Hz, 15-25Hz, 30-80Hz. Curves represent the bootstrapped distribution for the  
628 paired difference, and black dots and vertical lines represent the mean and 95% confidence intervals for  
629 the paired mean difference.  
630

#### 631 **Figure 7. Greater interlaminar coherence in hit trials in the stimulus-evoked period**

632 Interlaminar spike-spike coherence in the stimulus evoked period (60-260ms after stimulus onset). Same  
633 conventions as in Figure 6.  
634

#### 635 **Figure 8. Summary of results**

636 Hit trials have a larger pupil diameter in both the pre-stimulus and stimulus-evoked time periods. In the pre-  
637 pre-stimulus period, hits are characterized by decreased variability in superficial layer broad-spiking neurons,  
638 less phase-locking of deep layer neurons to low-frequency LFPs, and greater interlaminar spike-spike  
639 coherence between the superficial and deep layers. Microsaccades in the pre-stimulus period are  
640 associated with a much lower hit rate. Stimuli evoke higher firing rates across all three layers in hits. The  
641 stimulus-evoked period is associated with greater interlaminar spike-spike coherence between the input  
642 layer and the superficial and deep layers.  
643

#### 644 **Figure S1. Laminar recordings in V4**

645 (A) An artificial dura (AD) chamber is shown over dorsal V4 in the right hemisphere of Monkey A. The native  
646 dura mater was resected and replaced with a silicone based artificial dura, thereby providing an optically  
647 clear window into the cortex. Scale bar = 5mm. (B) An enlarged view of the boxed region in A clearly shows  
648 the sulci and the microvasculature. sts = superior temporal sulcus, lu = lunate sulcus, io = inferior occipital  
649 sulcus. Area V4 lies on the pre-lunate gyrus between the superior temporal and lunate sulci. Scale bar =  
650 2mm. (C) Electrophysiology setup: a plastic stabilizer with a circular aperture is secured in place inside the  
651 chamber such that the aperture is centered over the pre-lunate gyrus. A 16-channel linear array electrode  
652 (electrode spacing 150  $\mu\text{m}$ ) is positioned over the center of the gyrus and lowered into the cortex under  
653 microscopic guidance. The microvasculature pattern was used as a reference to target different cortical  
654 sites across recording sessions. (D) Example recording session in monkey C depicting 12 single unit  
655 waveforms (mean +/- s.e.m.) isolated along the cortical column. Gray waveforms correspond to narrow-  
656 spiking putative interneurons and black waveforms correspond to broad-spiking putative excitatory units.  
657 (E) Stimulus triggered local field potentials (LFPs) obtained by flashing 30ms high contrast ring stimuli in  
658 the receptive field of a V4 cortical column. LFP traces averaged across all stimulus repeats are shown  
659 color-coded as being part of either the superficial (green), input (gray) or deep (pink) layers. Layer  
660 assignment was done after current source-density analysis. (F) Current source-density (CSD) calculated  
661 as the second spatial derivative of the stimulus triggered LFPs and displayed as a colored map. The x-axis  
662 represents time from stimulus onset; the y-axis represents cortical depth oriented such that the pial surface  
663 is at the top and the white matter is at the bottom. Red hues represent current sink, blue hues represent  
664 current source. The input layer is identified as the first current sink followed by a reversal to current source.  
665 The superficial and deep layers have the opposite sink-source pattern. The CSD map has been spatially  
666 smoothed for visualization. (G) Stacked contour plots show spatial receptive fields (RFs) mapped along  
667 each contact point in the laminar probe. The spatial receptive fields were obtained by applying reverse

668 correlation to the LFP power evoked by sparse pseudo-random sequences of Gabor stimuli. The RFs are  
669 well aligned, indicating perpendicular penetration down a cortical column. Zero depth represents the center  
670 of the input layer as estimated from the CSD. **(H)** Contrast response functions – spikes rate as a function  
671 of stimulus contrast – are shown for 2 example units identified in a single recording session in Monkey A.  
672 Red and blue traces correspond to the attend-in to RF and attend-away from RF conditions respectively.  
673 The dotted lines represent the corresponding background firing-rates. The dashed lines are 4 standard  
674 deviations above baseline. A unit was considered as visually responsive, if the contrast response functions  
675 exceeded this threshold in both the attention conditions. Mean  $\pm$  s.e.m. Panels are reproduced from Nandy  
676 et al. (2017).  
677

678 **Figure S2. Microsaccades are preferentially directed towards the target in correct trials and have a**  
679 **slight correlation with pupil diameter**

680 Data is presented for all trials, regardless of orientation change (not just the threshold condition). **(A)** The  
681 histograms represent the direction of microsaccades relative to the attended stimulus (left column) or  
682 unattended stimulus (right column) in correct (top row) and incorrect (bottom row) trials. Black lines  
683 represent the mean (solid) and 99.5% confidence interval (dashed) of the bootstrapped null distribution  
684 estimated by pooling correct and incorrect microsaccades. \*  $p < 0.005$ . *Inset*: Schematic for calculation  
685 of relative microsaccade direction. Microsaccade is represented by the gray arrow **(B)** Scatterplot of  
686 microsaccade rate versus mean normalized pupil diameter, shows a small but statistically significant  
687 relationship between the two quantities ( $r^2 = 0.006$ ,  $p < 0.001$ ). Each dot is color-coded by trial length. 4%  
688 of trials with mean pupil diameter  $>2$  or  $<-2$  not shown.  
689

690 **Figure S3. Firing rates for individual neurons**

691 Target stimulus-evoked normalized firing rates in hit and miss trials for each recorded single and multi-unit  
692 cluster in hit and miss trials. Clusters are divided by layer: left=superficial, middle=input, right=deep. Related  
693 to Figure 3B. Each line represents the mean firing rate in response to target stimuli in hit and miss trials for  
694 a given unit. Data is color coded by unit type (gold=broad, teal=narrow, gray=multi-unit). See Experimental  
695 Procedures for normalization method.  
696

697  
698 **Figure S4. Additional PPC data**

699 **(A-B)** *Top*: Raw PPC values calculated for clusters recorded in the superficial **(A)** and **(B)** input layers in hit  
700 and miss trials, averaged into three frequency bands, 3-12 Hz, 15-25 Hz, and 30-80 Hz. PPC was calculated  
701 using the LFP recorded on the same channel as the spikes. *Bottom*: Bootstrapped estimation of the paired  
702 mean difference in PPC across hit and miss trials for each frequency band. Note that although there  
703 appears to be a difference in high-frequency PPC in the superficial layer, this population does not have  
704 significantly positive PPC in either condition, indicating that there is no phase-locking in either hits or  
705 misses. **(C)** Raw PPC values for neurons recorded in the deep layer in hit and miss trials, averaged into  
706 the same 3 frequency bands. Related to Figure 5B.  
707

708 **Table 1: Corresponding Null-Hypothesis Testing Results**

| Figure                                                        | Null-Hypothesis Test                                                                  | P-Value                                                                                     |
|---------------------------------------------------------------|---------------------------------------------------------------------------------------|---------------------------------------------------------------------------------------------|
| <b>2B (pupil diameter)</b>                                    | <i>t</i> -test (unpaired)                                                             | $p = 6.63624e - 09$                                                                         |
| <b>2C (microsaccades)</b>                                     | $\chi^2$ -test                                                                        | $p \ll 0.0001$                                                                              |
| <b>3B (target-evoked firing rate, single and multi-units)</b> | <i>t</i> -test (paired)<br>Bonferoni Corrected for 3 comparisons, $\alpha = 0.0166$   | Superficial: $p = 4.19108e - 05$<br>Input: $p = 1.10838e - 11$<br>Deep: $p = 1.75826e - 11$ |
| <b>3C (target-evoked firing rate, broad-spiking)</b>          | <i>t</i> -test (paired)<br>Bonferoni Corrected for 3 comparisons, $\alpha = 0.0166$   | Superficial: $p = 0.0526902$<br>Input: $p = 0.000124947$<br>Deep: $p = 0.00119012$          |
| <b>3C (target-evoked firing rate, narrow-spiking)</b>         | <i>t</i> -test (paired)<br>Bonferoni Corrected for 3 comparisons, $\alpha = 0.0166$   | Superficial: $p = 0.103689$<br>Input: $p = 0.00570757$<br>Deep: $p = 0.00393437$            |
| <b>4B (Fano Factor modulation index)</b>                      | <i>t</i> -test (unpaired)<br>Bonferoni Corrected for 3 comparisons, $\alpha = 0.0166$ | Superficial: $p = 0.0102155$<br>Input: $p > 0.05$<br>Deep: $p > 0.05$                       |
| <b>5B (deep PPC)</b>                                          | <i>t</i> -test (paired)<br>Bonferoni Corrected for 3 comparisons, $\alpha = 0.0166$   | 3-12 Hz: $p = 0.0142$<br>15-25 Hz: $p = 0.4064$<br>30-80 Hz: $p = 0.3600$                   |
| <b>6B (top, superficial-input SSC modulation index)</b>       | <i>t</i> -test<br>Bonferoni Corrected for 3 comparisons, $\alpha = 0.0166$            | 3-12 Hz: $p = 0.925338$<br>15-25 Hz: $p = 0.107304$<br>30-80 Hz: $p = 0.00394525$           |
| <b>6B (middle, superficial-deep SSC modulation index)</b>     | <i>t</i> -test<br>Bonferoni Corrected for 3 comparisons, $\alpha = 0.0166$            | 3-12 Hz: $p = 0.0125919$<br>15-25 Hz: $p = 0.00116552$<br>30-80 Hz: $p = 0.00142568$        |
| <b>6B (bottom, input-deep SSC modulation index)</b>           | <i>t</i> -test<br>Bonferoni Corrected for 3 comparisons, $\alpha = 0.0166$            | 3-12 Hz: $p = 0.260698$<br>15-25 Hz: $p = 0.0358178$<br>30-80 Hz: $p = 0.0325516$           |
| <b>7B (top, superficial-input SSC modulation index)</b>       | <i>t</i> -test<br>Bonferoni Corrected for 3 comparisons, $\alpha = 0.0166$            | 3-12 Hz: $p = 0.00344279$<br>15-25 Hz: $p = 3.17111e - 05$<br>30-80 Hz: $p = 0.00396824$    |
| <b>7B (middle, superficial-deep SSC modulation index)</b>     | <i>t</i> -test<br>Bonferoni Corrected for 3 comparisons, $\alpha = 0.0166$            | 3-12 Hz: $p = 0.0164846$<br>15-25 Hz: $p = 0.0890114$<br>30-80 Hz: $p = 0.00441928$         |
| <b>7B (bottom, input-deep SSC modulation index)</b>           | <i>t</i> -test<br>Bonferoni Corrected for 3 comparisons, $\alpha = 0.0166$            | 3-12 Hz: $p = 0.241036$<br>15-25 Hz: $p = 0.00140176$<br>30-80 Hz: $p = 6.84271e - 05$      |
| <b>S43B (superficial PPC)</b>                                 | <i>t</i> -test (paired)<br>Bonferoni Corrected for 3 comparisons, $\alpha = 0.0166$   | 3-12 Hz: $p = 0.8307$<br>15-25 Hz: $p = 0.2812$<br>30-80 Hz: $p = 0.0037^*$                 |
| <b>S43C (input PPC)</b>                                       | <i>t</i> -test (paired)<br>Bonferoni Corrected for 3 comparisons, $\alpha = 0.0166$   | 3-12 Hz: $p = 0.3440$<br>15-25 Hz: $p = 0.2517$<br>30-80 Hz: $p = 0.1881$                   |

709 \* Although this p-value is significant, the PPC in both conditions is below 0, indicating  
710 there is no phase-locking in either condition (Vinck et al., 2010).

711 **Table 2: GLM Values**

712

| Variable (Z-Scored)     | Estimated Coefficient | P-Value            |
|-------------------------|-----------------------|--------------------|
| Pupil Diameter          | 0.11754               | $p = 0.32869$      |
| Pretarget Microsaccades | -1.3116               | $p = 6.0757e - 08$ |
| Target Superficial FR   | 0.22414               | $p = 0.091946$     |
| Target Input FR         | 0.3276                | $p = 0.020068$     |
| Target Deep FR          | 0.11399               | $p = 0.45762$      |

713

714

715 **AUTHOR CONTRIBUTIONS**

716 MPJ and ASN conceptualized the project. ASN collected the data and supervised the  
717 project. MPM analyzed the data, with assistance from SD and IB. MPM, SD, ASN, MPJ,  
718 and JHR wrote the manuscript.

719

720 **ACKNOWLEDGEMENTS**

721 This research was supported by NIH R01 EY021827 to JHR and ASN, NARSAD Young  
722 Investigator Grant, Ziegler Foundation Grant, Yale Orthwein Scholar Funds & Lawrence  
723 Family Young Investigator Funds to ASN, NIH R00 EY025026 to MPJ, and by NEI core  
724 grants for vision research P30 EY019005 to the Salk Institute and P30 EY026878 to Yale  
725 University. MM was supported by training grants T32-NS007224 and T32-NS041228 to  
726 Yale University. We would like to thank Catherine Williams and Mat LeBlanc for excellent  
727 animal care.

728

## 729 REFERENCES

- 730  
731 Abbas, A.I., Sundiang, M.J.M., Henoch, B., Morton, M.P., Bolkan, S.S., Park, A.J.,  
732 Harris, A.Z., Kellendonk, C., and Gordon, J.A. (2018). Somatostatin Interneurons  
733 Facilitate Hippocampal-Prefrontal Synchrony and Prefrontal Spatial Encoding.  
734 *Neuron* 100, 926-939.e923.
- 735 Aston-Jones, G., and Cohen, J.D. (2005). An integrative theory of locus coeruleus-  
736 norepinephrine function: adaptive gain and optimal performance. *Annu Rev*  
737 *Neurosci* 28, 403-450.
- 738 Beatty, J., and Lucero-Wagoner, B. (2000). The pupillary system. *Handbook of*  
739 *psychophysiology* 2.
- 740 Beeler, G.W. (1967). Visual threshold changes resulting from spontaneous saccadic eye  
741 movements. *Vision Research* 7, 769-775.
- 742 Calin-Jageman, R.J., and Cumming, G. (2019). Estimation for Better Inference in  
743 Neuroscience. *eneuro* 6, ENEURO.0205-0219.2019.
- 744 Cohen, M.R., and Maunsell, J.H. (2009). Attention improves performance primarily by  
745 reducing interneuronal correlations. *Nat Neurosci* 12, 1594-1600.
- 746 Connors, B.W., and Gutnick, M.J. (1990). Intrinsic firing patterns of diverse neocortical  
747 neurons. *Trends Neurosci* 13, 99-104.
- 748 Davis, Z.W., Muller, L., Martinez-Trujillo, J., Sejnowski, T., and Reynolds, J.H. (2020).  
749 Spontaneous travelling cortical waves gate perception in behaving primates.  
750 *Nature* 587, 432-436.
- 751 Dehaene, S., and Changeux, J.-P. (2011). Experimental and Theoretical Approaches to  
752 Conscious Processing. *Neuron* 70, 200-227.
- 753 Desimone, R., and Duncan, J. (1995). Neural mechanisms of selective visual attention.  
754 *Annu Rev Neurosci* 18, 193-222.
- 755 Dicke, P.W., Chakraborty, S., and Thier, P. (2008). Neuronal correlates of perceptual  
756 stability during eye movements. *European Journal of Neuroscience* 27, 991-  
757 1002.
- 758 Douglas, R.J., and Martin, K.A.C. (2004). NEURONAL CIRCUITS OF THE  
759 NEOCORTEX. *Annual Review of Neuroscience* 27, 419-451.
- 760 Douglas, R.J., and Martin, K.A.C. (2007). Mapping the Matrix: The Ways of Neocortex.  
761 *Neuron* 56, 226-238.
- 762 Efrom, B., and Tibshirani, R.J. (1993). An introduction to the bootstrap. *Chapman and*  
763 *Hall/CRC*.
- 764 Fries, P. (2009). Neuronal Gamma-Band Synchronization as a Fundamental Process in  
765 Cortical Computation. *Annual Review of Neuroscience* 32, 209-224.
- 766 Fries, P., Reynolds, J.H., Rorie, A.E., and Desimone, R. (2001). Modulation of  
767 Oscillatory Neuronal Synchronization by Selective Visual Attention. *Science* 291,  
768 1560.
- 769 Fries, P., Womelsdorf, T., Oostenveld, R., and Desimone, R. (2008). The effects of  
770 visual stimulation and selective visual attention on rhythmic neuronal  
771 synchronization in macaque area V4. *The Journal of neuroscience : the official*  
772 *journal of the Society for Neuroscience* 28, 4823-4835.

- 773 Goodale, M.A., and Milner, A.D. (1992). Separate visual pathways for perception and  
774 action. *Trends in Neurosciences* 15, 20-25.
- 775 Hafed, Z.M., and Krauzlis, R.J. (2010). Microsaccadic suppression of visual bursts in  
776 the primate superior colliculus. *The Journal of neuroscience : the official journal*  
777 *of the Society for Neuroscience* 30, 9542-9547.
- 778 Harris, K.D., and Thiele, A. (2011). Cortical state and attention. *Nature Reviews*  
779 *Neuroscience* 12, 509-523.
- 780 Hartigan, J.A., and Hartigan, P.M. (1985). The dip test of unimodality. *The annals of*  
781 *Statistics*, 70-84.
- 782 Herman, W.X., Smith, R.E., Kronemer, S.I., Watsky, R.E., Chen, W.C., Gober, L.M.,  
783 Touloumes, G.J., Khosla, M., Raja, A., Horien, C.L., *et al.* (2017). A Switch and  
784 Wave of Neuronal Activity in the Cerebral Cortex During the First Second of  
785 Conscious Perception. *Cerebral Cortex* 29, 461-474.
- 786 Hess, E.H., and Polt, J.M. (1964). Pupil size in relation to mental activity during simple  
787 problem-solving. *Science* 143, 1190-1192.
- 788 Hirsch, J.A., and Martinez, L.M. (2006). Laminar processing in the visual cortical column.  
789 *Curr Opin Neurobiol* 16, 377-384.
- 790 Ho, J., Tumkaya, T., Aryal, S., Choi, H., and Claridge-Chang, A. (2019). Moving beyond  
791 P values: data analysis with estimation graphics. *Nature Methods* 16, 565-566.
- 792 Hoffmann, H. (2015). violin.m - Simple violin plot using matlab default kernel density  
793 estimation. (INRES (University of Bonn), Katzenburgweg 5, 53115 Germany., ).
- 794 Kawaguchi, Y. (1993). Groupings of nonpyramidal and pyramidal cells with specific  
795 physiological and morphological characteristics in rat frontal cortex. *Journal of*  
796 *Neurophysiology* 69, 416-431.
- 797 König, S.D., and Buffalo, E.A. (2014). A nonparametric method for detecting fixations  
798 and saccades using cluster analysis: removing the need for arbitrary thresholds.  
799 *Journal of neuroscience methods* 227, 121-131.
- 800 Levitt, H. (1971). Transformed Up-Down Methods in Psychoacoustics. *The Journal of*  
801 *the Acoustical Society of America* 49, 467-477.
- 802 Livingstone, M.S., and Hubel, D.H. (1981). Effects of sleep and arousal on the  
803 processing of visual information in the cat. *Nature* 291, 554-561.
- 804 Lowet, E., Gomes, B., Srinivasan, K., Zhou, H., Schafer, R.J., and Desimone, R. (2018).  
805 Enhanced Neural Processing by Covert Attention only during Microsaccades  
806 Directed toward the Attended Stimulus. *Neuron* 99, 207-214.e203.
- 807 Markram, H., Toledo-Rodriguez, M., Wang, Y., Gupta, A., Silberberg, G., and Wu, C.  
808 (2004). Interneurons of the neocortical inhibitory system. *Nature reviews*  
809 *Neuroscience* 5, 793-807.
- 810 Marshel, J.H., Kim, Y.S., Machado, T.A., Quirin, S., Benson, B., Kadmon, J., Raja, C.,  
811 Chibukhchyan, A., Ramakrishnan, C., Inoue, M., *et al.* (2019). Cortical layer-  
812 specific critical dynamics triggering perception. *Science* 365, eaaw5202.
- 813 McAdams, C.J., and Maunsell, J.H. (1999). Effects of attention on orientation-tuning  
814 functions of single neurons in macaque cortical area V4. *The Journal of*  
815 *neuroscience : the official journal of the Society for Neuroscience* 19, 431-441.
- 816 McCormick, D.A., and Bal, T. (1997). SLEEP AND AROUSAL: Thalamocortical  
817 Mechanisms. *Annual Review of Neuroscience* 20, 185-215.



- 818 McCormick, D.A., Connors, B.W., Lighthall, J.W., and Prince, D.A. (1985). Comparative  
819 electrophysiology of pyramidal and sparsely spiny stellate neurons of the  
820 neocortex. *J Neurophysiol* 54, 782-806.
- 821 McCormick, D.A., Nestvogel, D.B., and He, B.J. (2020). Neuromodulation of Brain State  
822 and Behavior. *Annual Review of Neuroscience* 43, null.
- 823 McDougal, D.H., and Gamlin, P.D. (2015). Autonomic control of the eye. *Compr Physiol*  
824 5, 439-473.
- 825 McGinley, M.J., David, S.V., and McCormick, D.A. (2015). Cortical Membrane Potential  
826 Signature of Optimal States for Sensory Signal Detection. *Neuron* 87, 179-192.
- 827 Migliore, M., and Shepherd, G.M. (2005). An integrated approach to classifying neuronal  
828 phenotypes. *Nature Reviews Neuroscience* 6, 810-818.
- 829 Mitchell, J.F., Sundberg, K.A., and Reynolds, J.H. (2007). Differential attention-  
830 dependent response modulation across cell classes in macaque visual area V4.  
831 *Neuron* 55, 131-141.
- 832 Mitchell, J.F., Sundberg, K.A., and Reynolds, J.H. (2009). Spatial attention decorrelates  
833 intrinsic activity fluctuations in macaque area V4. *Neuron* 63, 879-888.
- 834 Mitra, P. (2007). *Observed brain dynamics* (Oxford University Press).
- 835 Mitra, P.P., and Pesaran, B. (1999). Analysis of dynamic brain imaging data. *Biophys J*  
836 76, 691-708.
- 837 Mitzdorf, U. (1985). Current source-density method and application in cat cerebral  
838 cortex: investigation of evoked potentials and EEG phenomena. *Physiol Rev* 65,  
839 37-100.
- 840 Moore, T., and Fallah, M. (2001). Control of eye movements and spatial attention. *Proc*  
841 *Natl Acad Sci U S A* 98, 1273-1276.
- 842 Moore, T., and Zirnsak, M. (2017). Neural Mechanisms of Selective Visual Attention.  
843 *Annual Review of Psychology* 68, 47-72.
- 844 Moran, J., and Desimone, R. (1985). Selective attention gates visual processing in the  
845 extrastriate cortex. *Science* 229, 782-784.
- 846 Moreno-Bote, R., Beck, J., Kanitscheider, I., Pitkow, X., Latham, P., and Pouget, A.  
847 (2014). Information-limiting correlations. *Nat Neurosci* 17, 1410-1417.
- 848 Mountcastle, V.B. (1997). The columnar organization of the neocortex. *Brain* 120 ( Pt  
849 4), 701-722.
- 850 Nandy, A.S., Nassi, J.J., and Reynolds, J.H. (2017). Laminar Organization of Attentional  
851 Modulation in Macaque Visual Area V4. *Neuron* 93, 235-246.
- 852 Nassi, J.J., Avery, M.C., Cetin, A.H., Roe, A.W., and Reynolds, J.H. (2015). Optogenetic  
853 Activation of Normalization in Alert Macaque Visual Cortex. *Neuron* 86, 1504-  
854 1517.
- 855 Nowak, L.G., Azouz, R., Sanchez-Vives, M.V., Gray, C.M., and McCormick, D.A. (2003).  
856 Electrophysiological classes of cat primary visual cortical neurons in vivo as  
857 revealed by quantitative analyses. *J Neurophysiol* 89, 1541-1566.
- 858 Pettine, W.W., Steinmetz, N.A., and Moore, T. (2019). Laminar segregation of sensory  
859 coding and behavioral readout in macaque V4. *Proceedings of the National*  
860 *Academy of Sciences* 116, 14749-14754.
- 861 Pins, D., and ffytche, D. (2003). The Neural Correlates of Conscious Vision. *Cerebral*  
862 *Cortex* 13, 461-474.

- 863 Prins, N., and Kingdom, F.A.A. (2018). Applying the Model-Comparison Approach to  
864 Test Specific Research Hypotheses in Psychophysical Research Using the  
865 Palamedes Toolbox. *Frontiers in Psychology* 9.
- 866 Reimer, J., Froudarakis, E., Cadwell, Cathryn R., Yatsenko, D., Denfield, George H.,  
867 and Tolias, Andreas S. (2014). Pupil Fluctuations Track Fast Switching of Cortical  
868 States during Quiet Wakefulness. *Neuron* 84, 355-362.
- 869 Ress, D., and Heeger, D.J. (2003). Neuronal correlates of perception in early visual  
870 cortex. *Nat Neurosci* 6, 414-420.
- 871 Reynolds, J.H., Pasternak, T., and Desimone, R. (2000). Attention increases sensitivity  
872 of V4 neurons. *Neuron* 26, 703-714.
- 873 Roe, Anna W., Chelazzi, L., Connor, Charles E., Conway, Bevil R., Fujita, I., Gallant,  
874 Jack L., Lu, H., and Vanduffel, W. (2012). Toward a Unified Theory of Visual Area  
875 V4. *Neuron* 74, 12-29.
- 876 Rohenkohl, G., Bosman, C.A., and Fries, P. (2018). Gamma Synchronization between  
877 V1 and V4 Improves Behavioral Performance. *Neuron* 100, 953-963.e953.
- 878 Ruiz, O., Lustig, B.R., Nassi, J.J., Cetin, A., Reynolds, J.H., Albright, T.D., Callaway,  
879 E.M., Stoner, G.R., and Roe, A.W. (2013). Optogenetics through windows on the  
880 brain in the nonhuman primate. *J Neurophysiol* 110, 1455-1467.
- 881 Schafer, R.J., and Moore, T. (2011). Selective attention from voluntary control of  
882 neurons in prefrontal cortex. *Science* 332, 1568-1571.
- 883 Schurger, A., Pereira, F., Treisman, A., and Cohen, J.D. (2010). Reproducibility  
884 distinguishes conscious from nonconscious neural representations. *Science* 327,  
885 97-99.
- 886 Siapas, A.G., Lubenov, E.V., and Wilson, M.A. (2005). Prefrontal Phase Locking to  
887 Hippocampal Theta Oscillations. *Neuron* 46, 141-151.
- 888 Spitzer, H., Desimone, R., and Moran, J. (1988). Increased attention enhances both  
889 behavioral and neuronal performance. *Science* 240, 338-340.
- 890 Steriade, M., Nuñez, A., and Amzica, F. (1993). A novel slow (< 1 Hz) oscillation of  
891 neocortical neurons in vivo: depolarizing and hyperpolarizing components. *The*  
892 *Journal of neuroscience : the official journal of the Society for Neuroscience* 13,  
893 3252-3265.
- 894 Tang, L., and Higley, M.J. (2020). Layer 5 Circuits in V1 Differentially Control Visuomotor  
895 Behavior. *Neuron* 105, 346-354.e345.
- 896 van Vugt, B., Dagnino, B., Vartak, D., Safaai, H., Panzeri, S., Dehaene, S., and  
897 Roelfsema, P.R. (2018). The threshold for conscious report: Signal loss and  
898 response bias in visual and frontal cortex. *Science* 360, 537.
- 899 Vinck, M., van Wingerden, M., Womelsdorf, T., Fries, P., and Pennartz, C.M. (2010).  
900 The pairwise phase consistency: a bias-free measure of rhythmic neuronal  
901 synchronization. *NeuroImage* 51, 112-122.
- 902 von Krosigk, M., Bal, T., and McCormick, D. (1993). Cellular mechanisms of a  
903 synchronized oscillation in the thalamus. *Science* 261, 361-364.
- 904 Watson, A.B. (1979). Probability summation over time. *Vision Research* 19, 515-522.
- 905 Wichmann, F.A., and Hill, N.J. (2001). The psychometric function: I. Fitting, sampling,  
906 and goodness of fit. *Perception & Psychophysics* 63, 1293-1313.
- 907 Wonders, C.P., and Anderson, S.A. (2006). The origin and specification of cortical  
908 interneurons. *Nature reviews Neuroscience* 7, 687-696.

- 909 Worden, M.S., Foxe, J.J., Wang, N., and Simpson, G.V. (2000). Anticipatory biasing of  
910 visuospatial attention indexed by retinotopically specific alpha-band  
911 electroencephalography increases over occipital cortex. *The Journal of*  
912 *neuroscience : the official journal of the Society for Neuroscience* 20, Rc63.
- 913 Yerkes, R.M., and Dodson, J.D. (1908). The relation of strength of stimulus to rapidity  
914 of habit-formation. *Journal of Comparative Neurology and Psychology* 18, 459-  
915 482.
- 916 Zeng, H., and Sanes, J.R. (2017). Neuronal cell-type classification: challenges,  
917 opportunities and the path forward. *Nature Reviews Neuroscience* 18, 530-546.
- 918 Zohary, E., Shadlen, M.N., and Newsome, W.T. (1994). Correlated neuronal discharge  
919 rate and its implications for psychophysical performance. *Nature* 370, 140-143.
- 920 Zuber, B.L., and Stark, L. (1966). Saccadic suppression: elevation of visual threshold  
921 associated with saccadic eye movements. *Exp Neurol* 16, 65-79.

922

## Figure 1

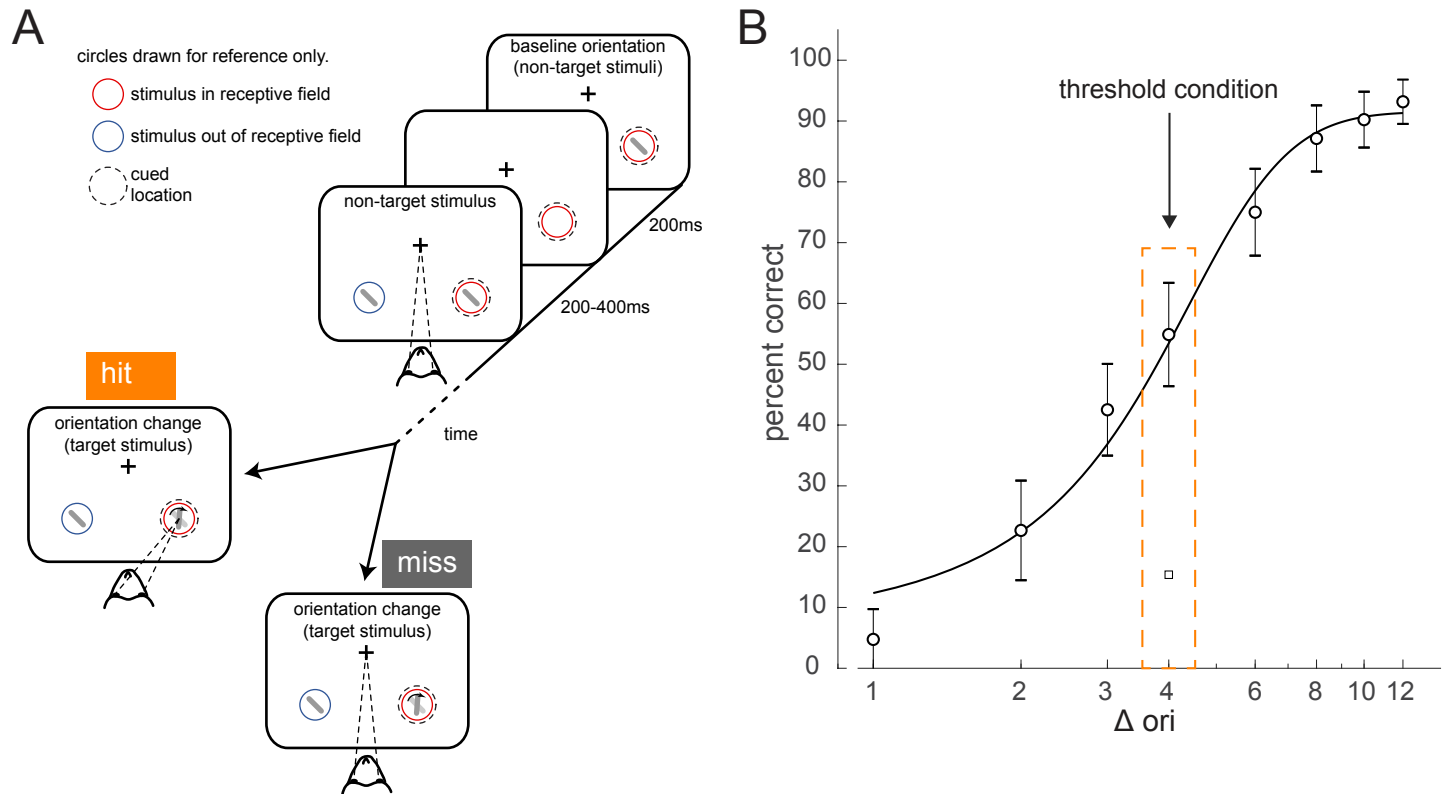

### Figure 1. Orientation change detection task at perceptual threshold

(A) Schematic of task structure. The monkey initiated a trial by fixating on the center of the screen. Two Gabor stimuli (represented by oriented lines) were presented for 200 ms and then turned off for 200-400ms. This was repeated until, at an unpredictable time, one of the stimuli changed orientation. The monkey could report having seen the change by making an eye movement to the location of the target stimulus to receive a reward (hit trials). If the monkey failed to report the orientation change and maintained fixation on the center of the screen it was not rewarded (miss trials). Before a block of trials, the monkey was cued as to which stimulus was likely to undergo the change (95% valid cue). In 5% of trials the orientation change occurred at the other location (foil trials). (B) Example behavioral psychometric function from one recording session and attention condition. Behavioral performance (hit rate, circles) is presented as a function of orientation change. Data was fitted with a logistic function. The threshold condition, trials with performance halfway between the upper and lower asymptotes of the logistic function, is indicated by the orange box. Error bars represent standard deviation calculated with a jackknife procedure (20 jackknives). The square symbol indicates foil trial performance.

## Figure 2

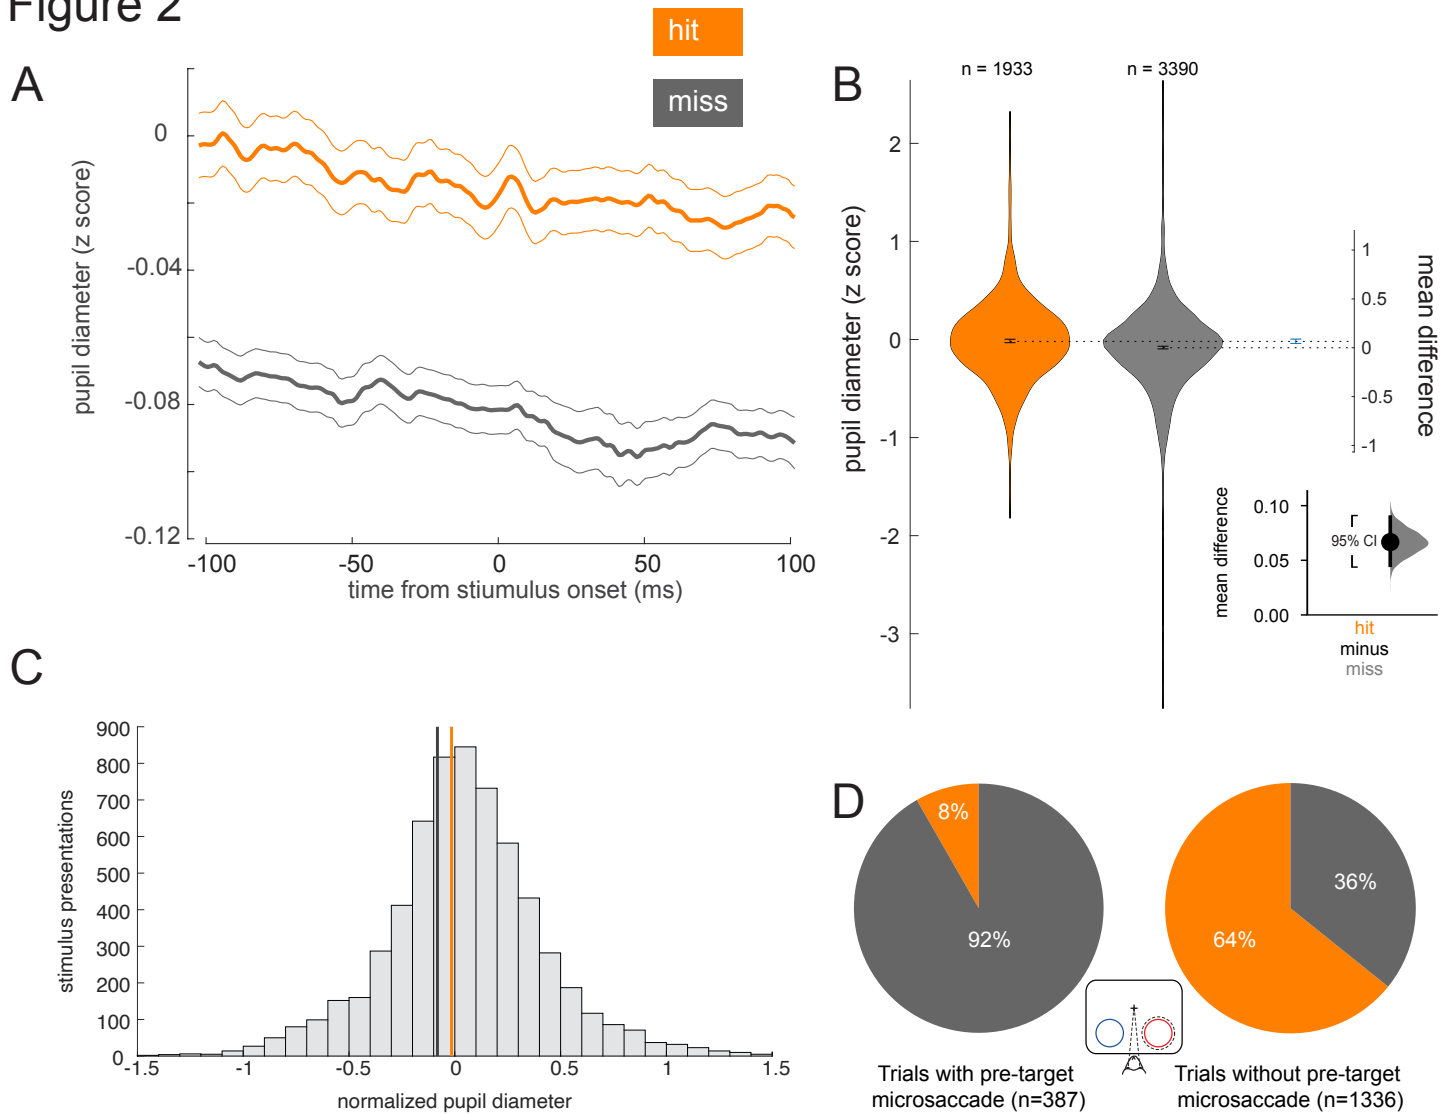

### Figure 2. Hit trials have larger pupil diameter whereas microsaccades more often precede misses

(A) Normalized pupil diameter for hit and miss trials in the threshold condition. 0 ms corresponds to stimulus onset. Mean  $\pm$  s.e.m. (B) Distribution of pupil diameter values associated with hit and miss trials. Pupil diameter was averaged from 100ms before to 100ms after non-target stimulus onset. Violin plots were generated using kernel smoothing (See Experimental Procedures). Error bars represent 95% confidence intervals for the mean of each distribution, and the mean difference (blue, right axes). *Inset*: zoomed in view of the mean difference between hit and miss trials. Black bar represents a 95% confidence interval of the mean difference. Shaded region reflects the distribution of the bootstrapped estimation of the mean difference. (C) Histogram of mean pupil diameter around the time of stimulus onset (calculated as in B). Orange and gray lines represent the mean pupil diameter for hit and miss trials respectively. (D) Hit rate for trials with (*left*, 387 trials) and without (*right*, 1336 trials) a microsaccade detected in the time window 0-400ms before target onset. There is a significantly lower hit rate in trials with a microsaccade ( $p < 0.0001$ ,  $\chi^2$ -test).

## Figure 3

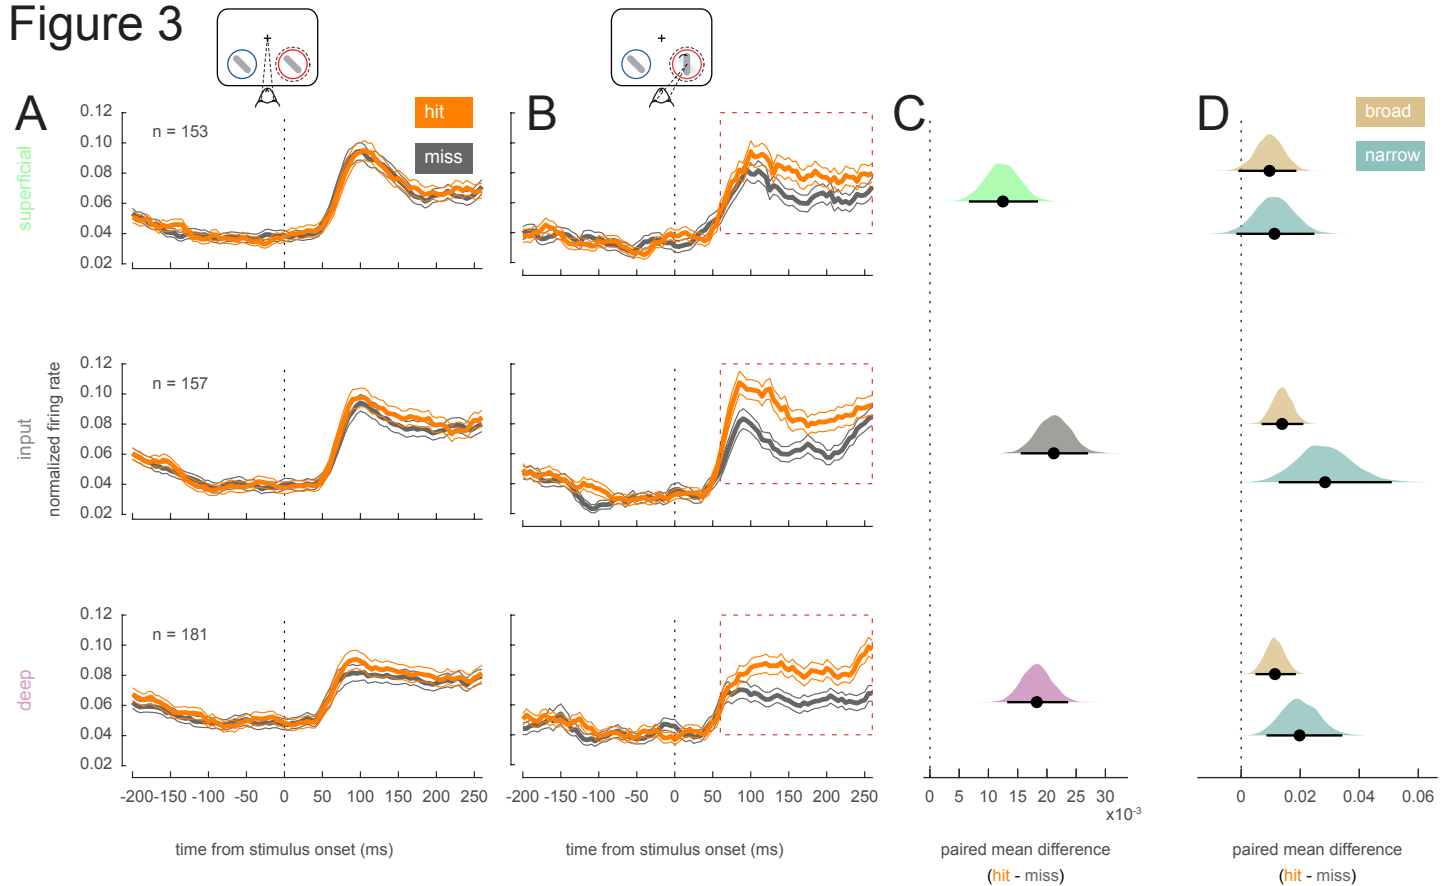

### Figure 3. Target stimuli evoke higher firing rates in hit trials

Rows correspond to different layers (top=superficial, middle=input, bottom=deep). **(A)** Population (single and multi-unit) non-target PSTH of visually responsive neurons for the hit (orange) and miss (dark-gray) trials in the threshold condition (mean  $\pm$  s.e.m). **(B)** As in **A** but for target stimuli. **(C)** Bootstrapped estimation of the paired mean difference in target stimulus-evoked firing rate across hit and miss trials in the time window 60-260ms (red dotted box in **B**) after target stimulus onset. Shaded regions represent the bootstrapped estimation of the paired mean difference in firing rate (hit - miss), and black lines are 95% confidence intervals. Plots include data from both single and multi-units, separated by layer (top=superficial, middle=input, bottom=deep). **(D)** As in **C**, bootstrapped estimation of the paired mean difference in firing rate for hit trials compared to miss trials in the target stimulus-evoked period, but only for single-units broken up by cell class (gold=broad, teal=narrow).

## Figure 4

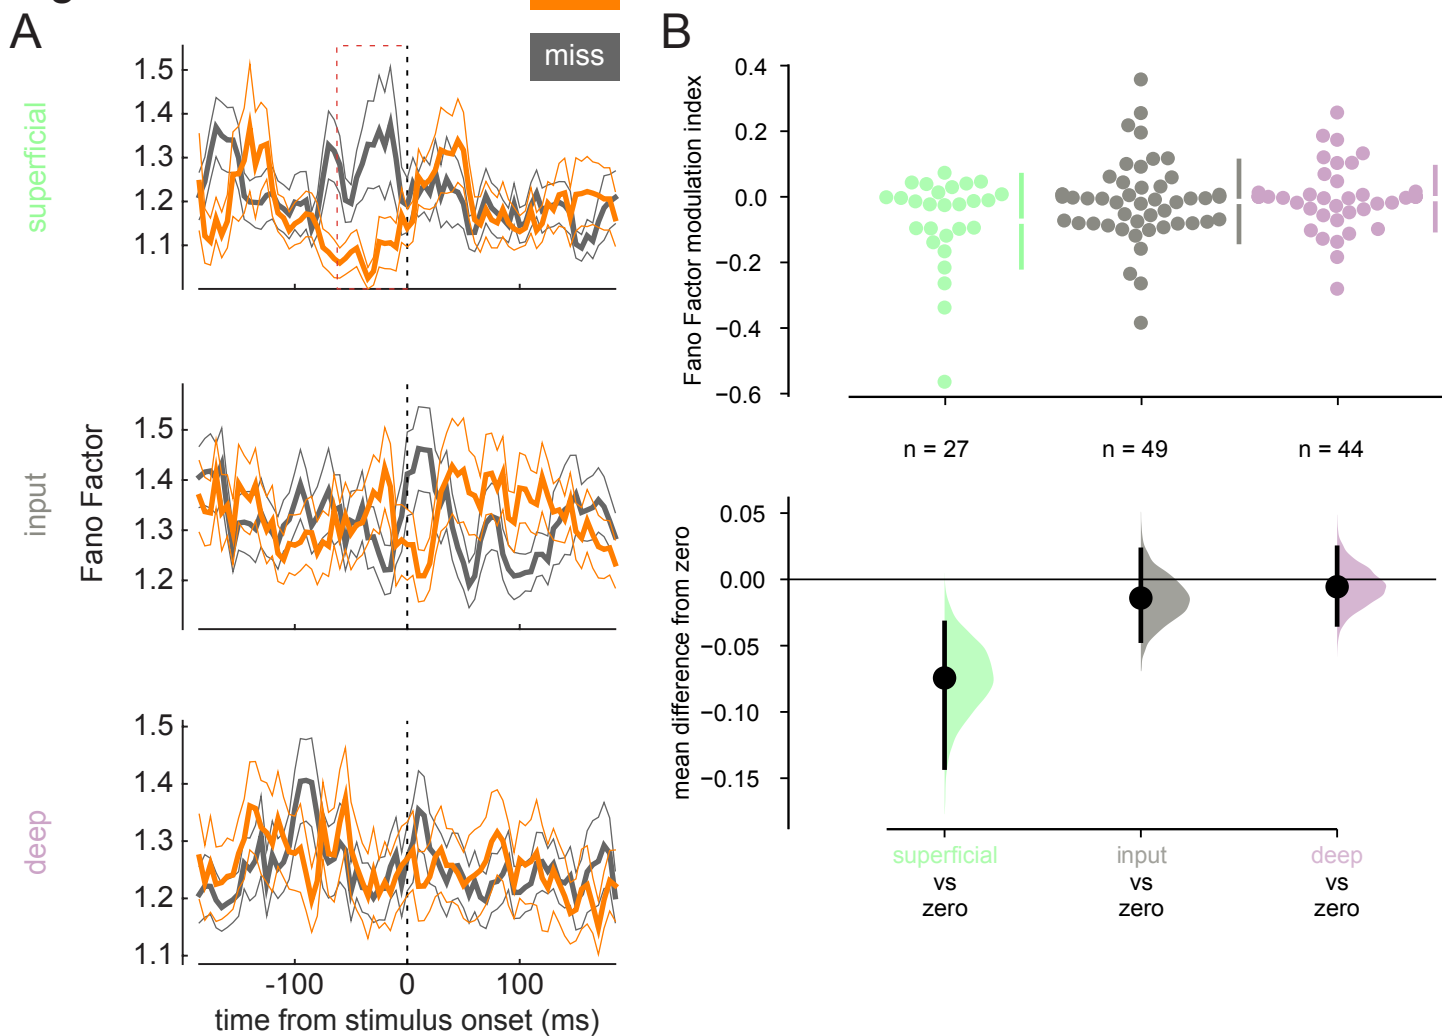

### Figure 4. Broad-spiking neurons in the superficial layer have decreased variability in hit trials

(A) Rows correspond to different layers (top=superficial, middle=input, bottom=deep). The Fano Factor of broad-spiking putative excitatory neurons for the hit and miss trials in the threshold condition (mean  $\pm$  s.e.m). There is a significant decrease in variability for the hit trials prior to stimulus onset only in the superficial layer. 0 ms corresponds to non-target stimulus onset. The average Fano Factor within a 60ms time-window (red dashed box) prior to stimulus onset is plotted in B. (B) Top: Fano Factor modulation index for each broad-spiking neurons recorded in each layer, averaged in the 60ms preceding stimulus onset. Bottom: Bootstrapped estimation of the mean difference of the Fano Factor modulation index from zero in each of the three layers. Colored curves represent the estimated bootstrapped distribution. Black dots and lines reflect the mean and 95% confidence intervals of the distributions.

## Figure 5

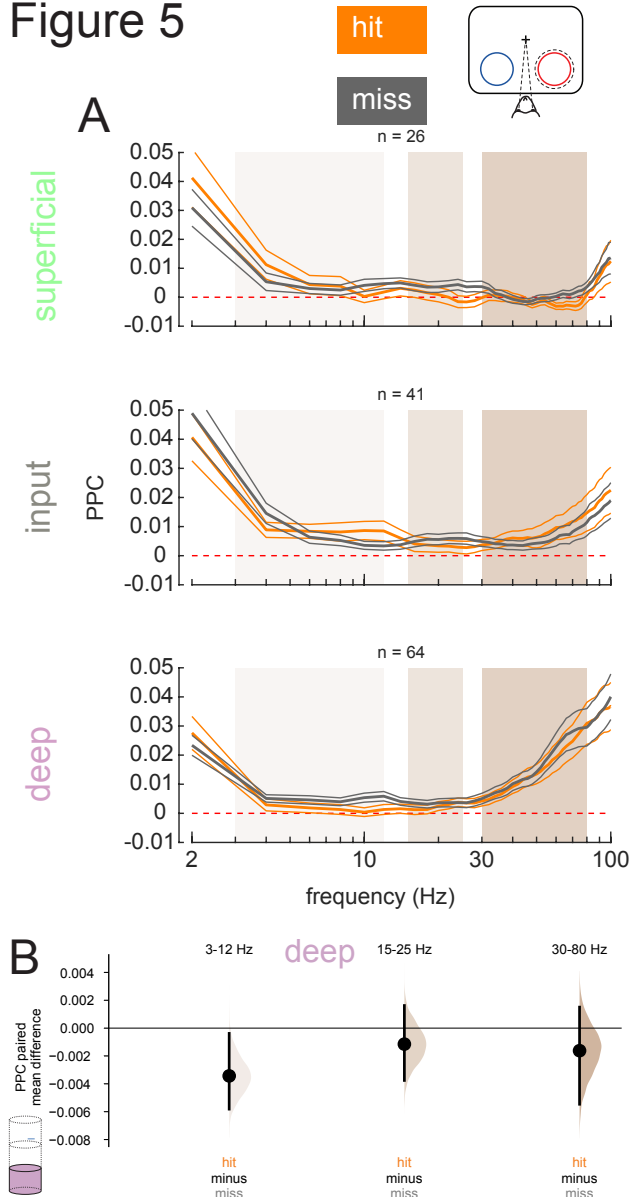

### Figure 5. Deep layer neurons are phase-locked to low-frequency rhythms in miss trials

(A) Pairwise phase consistency (PPC) of single and multi-units in each layer to the local field potential (LFP) signal recorded from the same channel in hit and miss trials at threshold. PPC was calculated in the pre-stimulus period (0-200 ms before stimulus onset). Dashed red line indicates a PPC of 0, below which there is no consistent relationship between spikes and LFP phase. (B) Bootstrapped estimation plot for the paired mean difference in PPC for deep layer neurons over three frequency bands: 3-12Hz, 15-25Hz, 30-80Hz. Curves represent the bootstrapped distribution for the paired difference, and black dots and vertical lines represent the mean and 95% confidence intervals for the paired mean difference



Figure 6

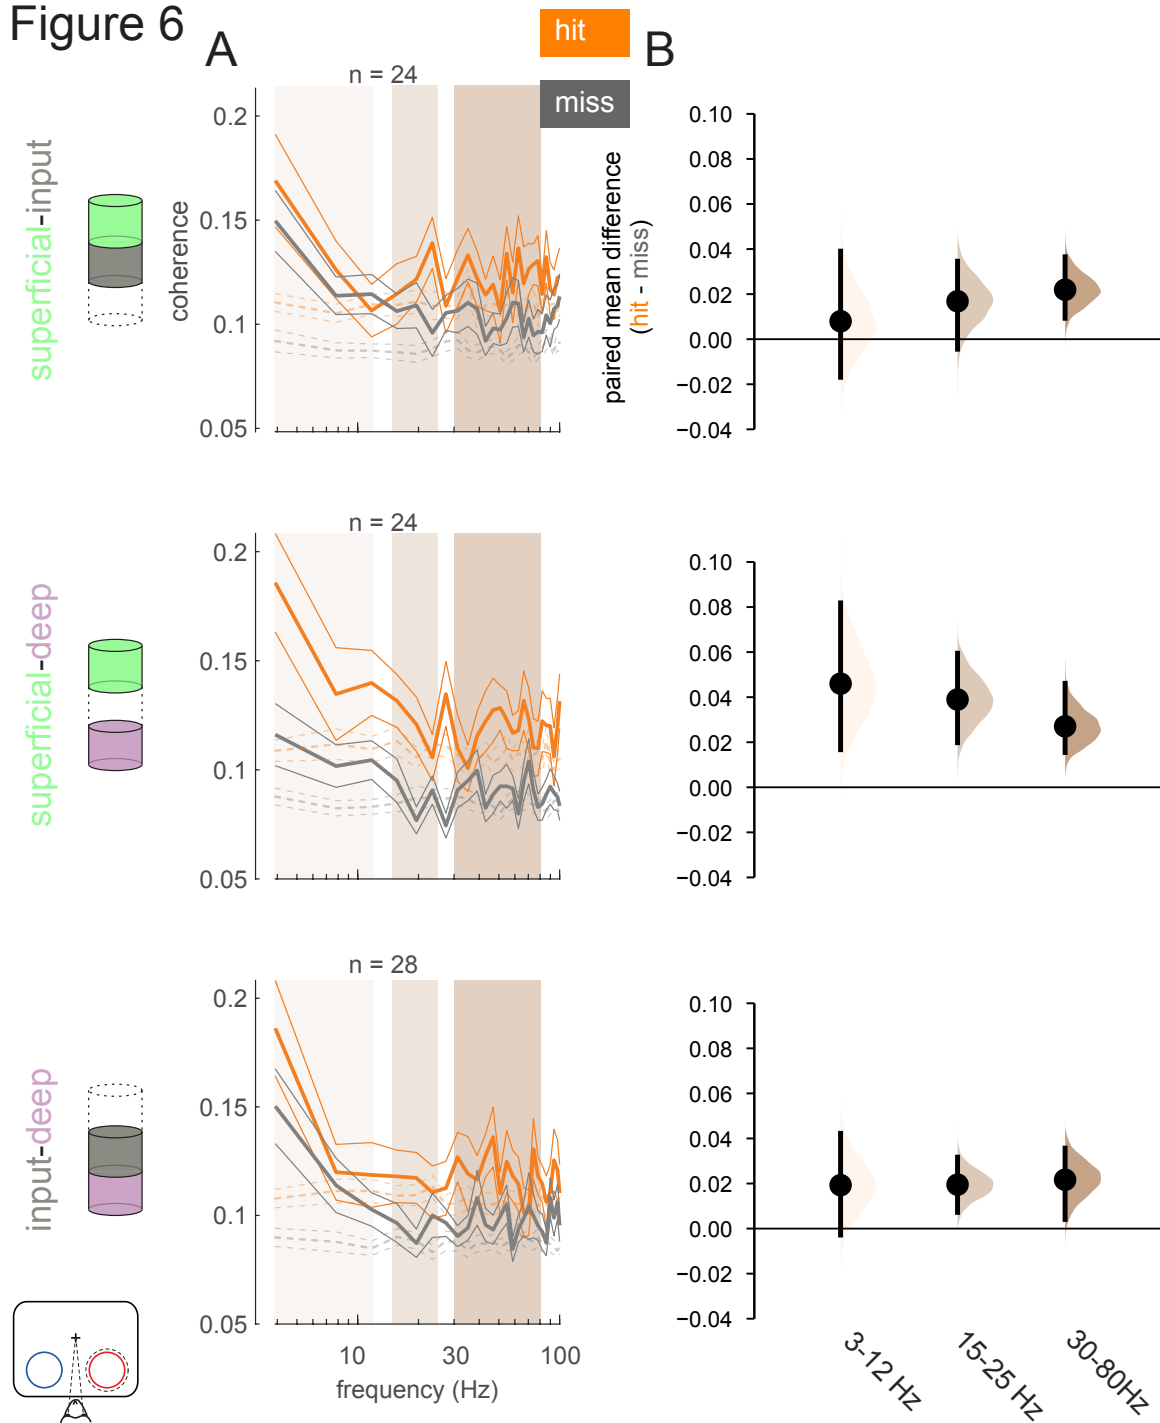

**Figure 6. Greater interlaminar coherence in hit trials in the pre-stimulus period**

Interlaminar spike-spike coherence in the pre-stimulus period (0-200ms prior to stimulus onset). Rows correspond to different pairs of layers (*top*=superficial-input, *middle*=superficial-deep, *bottom*=input-deep). **(A)** Multi-unit interlaminar spike-spike coherence (SSC) calculated in the 200ms before non-target stimulus onset in hit and miss trials (solid lines, mean  $\pm$  s.e.m). Firing rates were matched across hit and miss trials. Dashed lines represent coherence calculated with shuffled trial identities (mean  $\pm$  s.e.m). **(B)** Bootstrapped estimation plot for the paired mean difference in SSC for each pair of layers averaged over three frequency bands : 3-12Hz, 15-25Hz, 30-80Hz. Curves represent the bootstrapped distribution for the paired difference, and black dots and vertical lines represent the mean and 95% confidence intervals for the paired mean difference.

## Figure 7

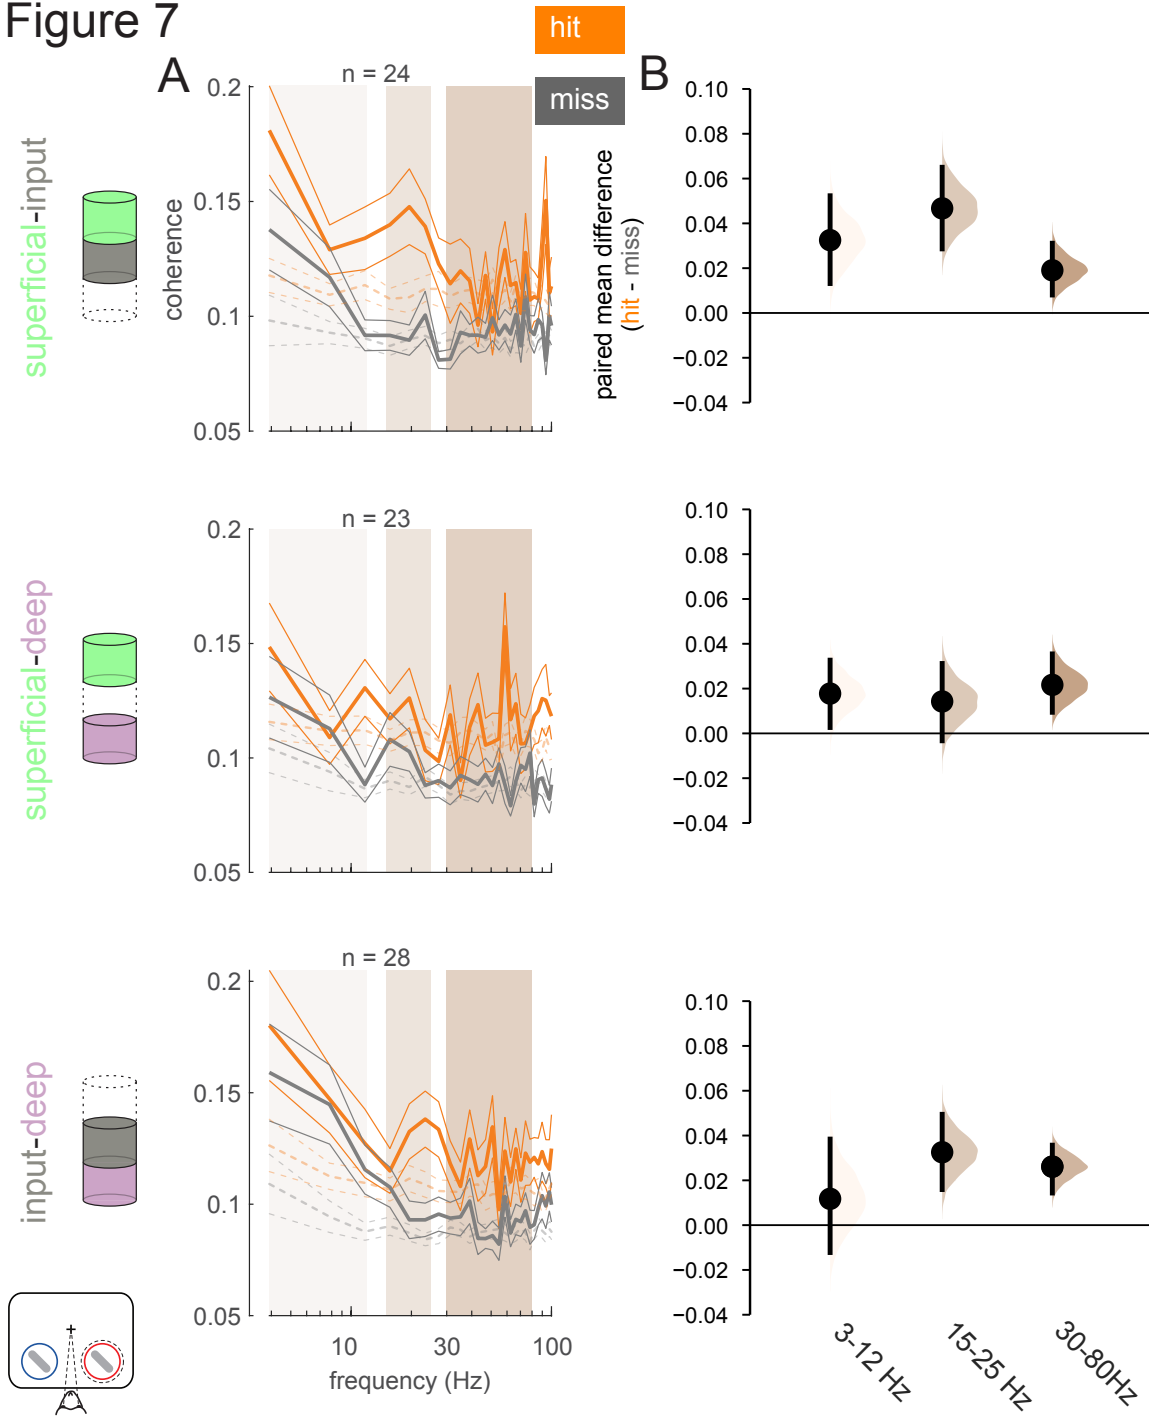

### Figure 7. Greater interlaminar coherence in hit trials in the stimulus-evoked period

Interlaminar spike-spike coherence in the stimulus evoked period (60-260ms after stimulus onset). Same conventions as in Figure 6.

## Figure 8

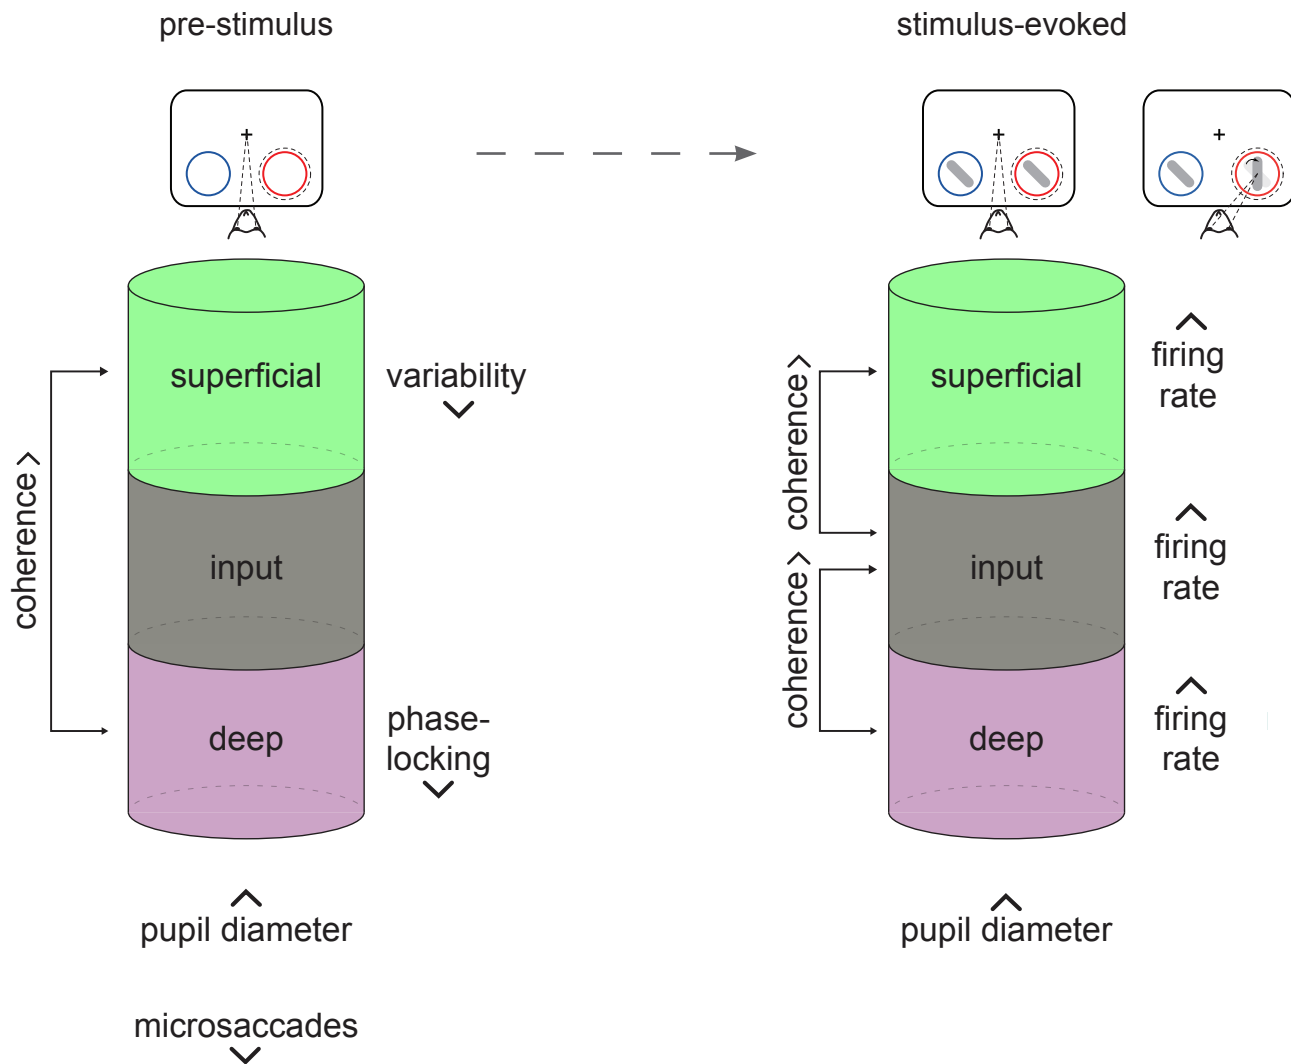

### Figure 8. Summary of results

Hit trials have a larger pupil diameter in both the pre-stimulus and stimulus-evoked time periods. In the pre-stimulus period, hits are characterized by decreased variability in superficial layer broad-spiking neurons, less phase-locking of deep layer neurons to low-frequency LFPs, and greater interlaminar spike-spike coherence between the superficial and deep layers. Microsaccades in the pre-stimulus period are associated with a much lower hit rate. Stimuli evoke higher firing rates across all three layers in hits. The stimulus-evoked period is associated with greater interlaminar spike-spike coherence between the input layer and the superficial and deep layers.

## Figure S1

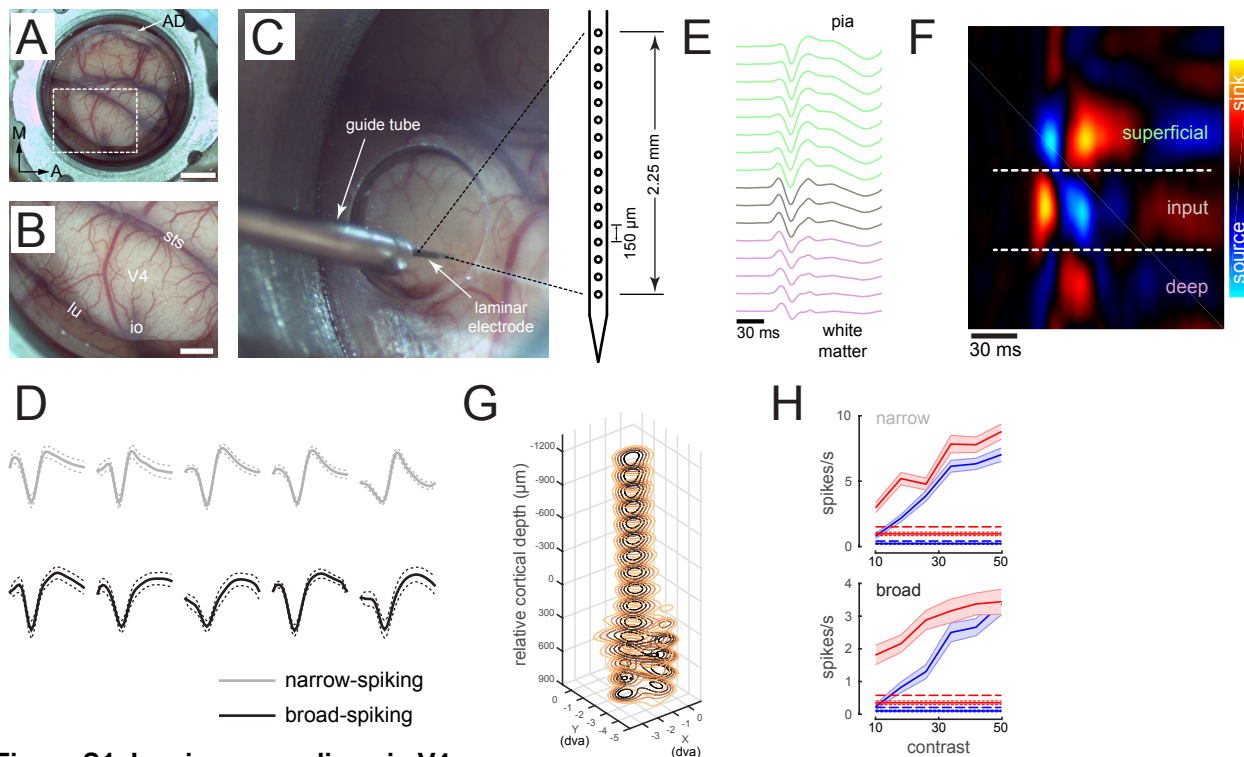

**Figure S1. Laminal recordings in V4**

(A) An artificial dura (AD) chamber is shown over dorsal V4 in the right hemisphere of Monkey A. The native dura mater was resected and replaced with a silicone based artificial dura, thereby providing an optically clear window into the cortex. Scale bar = 5mm. (B) An enlarged view of the boxed region in A clearly shows the sulci and the microvasculature. sts = superior temporal sulcus, lu = lunate sulcus, io = inferior occipital sulcus. Area V4 lies on the pre-lunate gyrus between the superior temporal and lunate sulci. Scale bar = 2mm. (C) Electrophysiology setup: a plastic stabilizer with a circular aperture is secured in place inside the chamber such that the aperture is centered over the pre-lunate gryus. A 16-channel linear array electrode (electrode spacing 150m) is positioned over the center of the gyrus and lowered into the cortex under microscopic guidance. The microvasculature pattern was used as a reference to target different cortical sites across recording sessions. (D) Example recording session in monkey C depicting 12 single unit waveforms (mean  $\pm$  s.e.m.) isolated along the cortical column. Gray waveforms correspond to narrow-spiking putative interneurons and black waveforms correspond to broad-spiking putative excitatory units. (E) Stimulus triggered local field potentials (LFPs) obtained by flashing 30ms high contrast ring stimuli in the receptive field of a V4 cortical column. LFP traces averaged across all stimulus repeats are shown color-coded as being part of either the superficial (green), input (gray) or deep (pink) layers. Layer assignment was done after current source-density analysis. (F) Current source-density (CSD) calculated as the second spatial derivative of the stimulus triggered LFPs and displayed as a colored map. The x-axis represents time from stimulus onset; the y-axis represents cortical depth oriented such that the pial surface is at the top and the white matter is at the bottom. Red hues represent current sink, blue hues represent current source. The input layer is identified as the first current sink followed by a reversal to current source. The superficial and deep layers have the opposite sink-source pattern. The CSD map has been spatially smoothed for visualization. (G) Stacked contour plots show spatial receptive fields (RFs) mapped along each contact point in the laminar probe. The spatial receptive fields were obtained by applying reverse correlation to the LFP power evoked by sparse pseudo-random sequences of Gabor stimuli. The RFs are well aligned, indicating perpendicular penetration down a cortical column. Zero depth represents the center of the input layer as estimated from the CSD. (H) Contrast response functions – spikes rate as a function of stimulus contrast – are shown for 2 example units identified in a single recording session in Monkey A. Red and blue traces correspond to the attend-in to RF and attend-away from RF conditions respectively. The dotted lines represent the corresponding background firing-rates. The dashed lines are 4 standard deviations above baseline. A unit was considered as visually responsive, if the contrast response functions exceeded this threshold in both the attention conditions. Mean  $\pm$  s.e.m. Panels are reproduced from Nandy et al. (2017).

## Figure S2

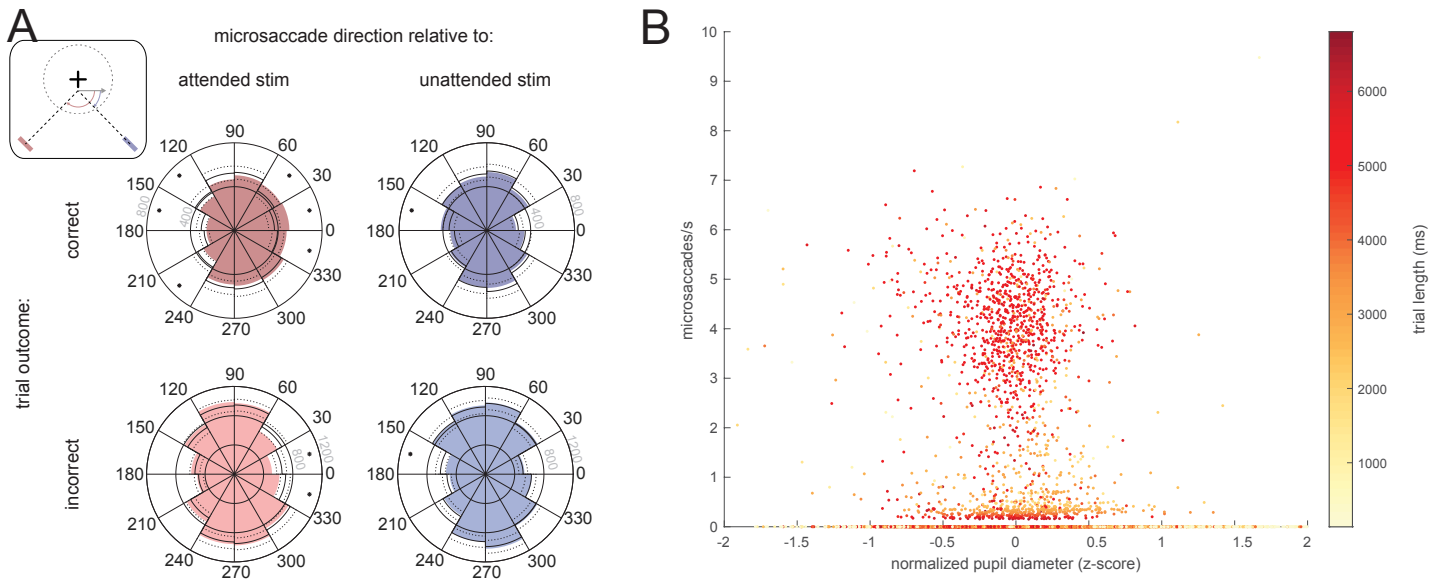

### Figure S2. Microsaccades are preferentially directed towards the target in correct trials and have a slight correlation with pupil diameter

Data is presented for all trials, regardless of orientation change (not just the threshold condition). **(A)** The histograms represent the direction of microsaccades relative to the attended stimulus (left column) or unattended stimulus (right column) in correct (top row) and incorrect (bottom row) trials. Black lines represent the mean (solid) and 99.5% confidence interval (dashed) of the bootstrapped null distribution estimated by pooling correct and incorrect microsaccades. *Inset:* Schematic for calculation of relative microsaccade direction. Microsaccade is represented by the gray arrow **(B)** Scatterplot of microsaccade rate versus mean normalized pupil diameter, shows a small but statistically significant relationship between the two quantities ( $r^2 = 0.006$ , ). Each dot is color-coded by trial length. 4% of trials with mean pupil diameter  $>2$  or  $<-2$  not shown.

## Figure S3

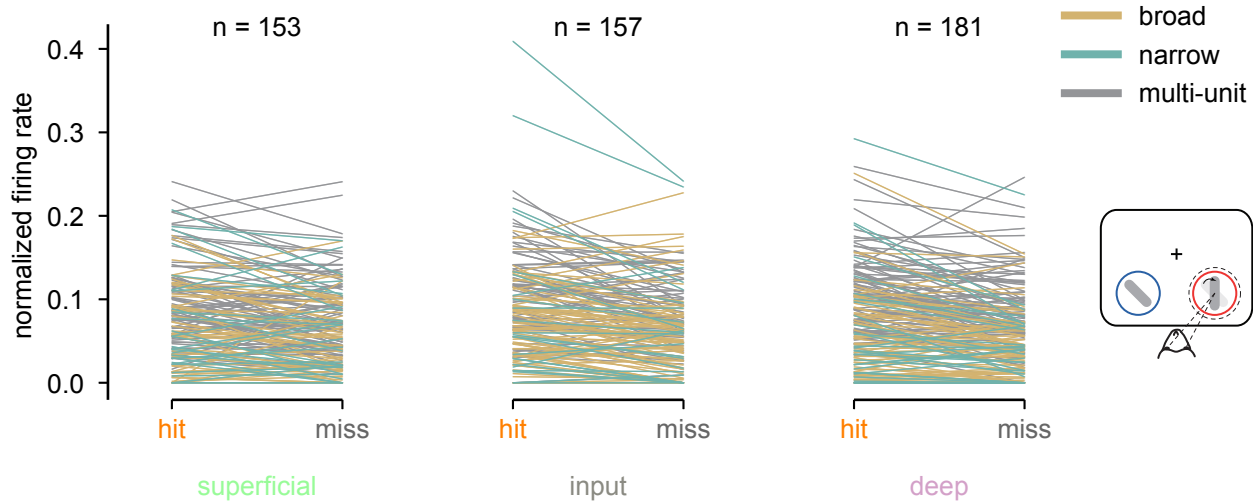

### Figure S3. Firing rates for individual neurons

Target stimulus-evoked normalized firing rates in hit and miss trials for each recorded single and multi-unit cluster in hit and miss trials. Clusters are divided by layer: left=superficial, middle=input, right=deep. Related to Figure 3B. Each line represents the mean firing rate in response to target stimuli in hit and miss trials for a given unit. Data is color coded by unit type (gold=broad, teal=narrow, gray=multi-unit). See Experimental Procedures for normalization method.

## Figure S4

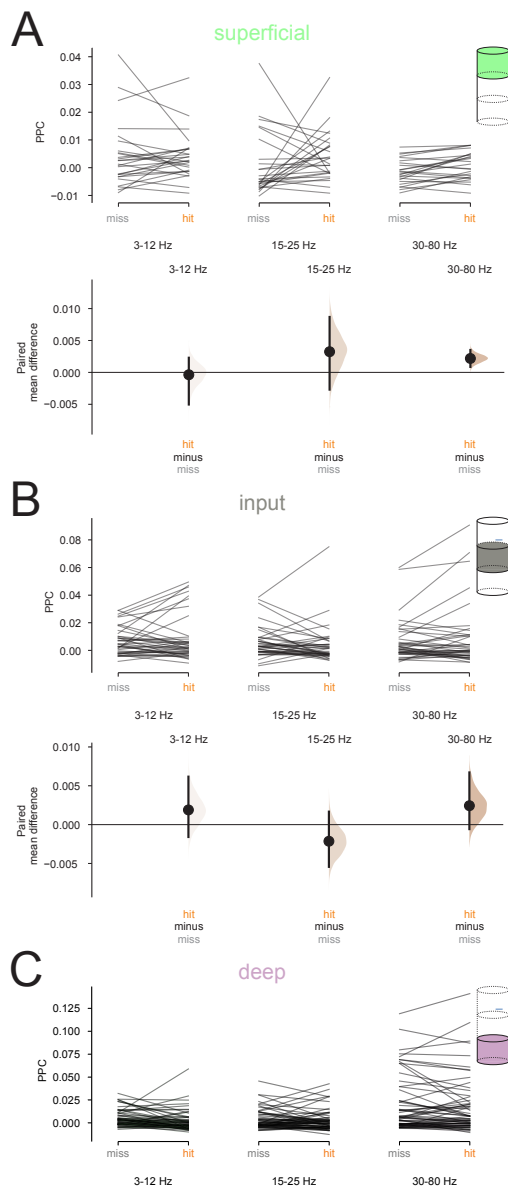

### Figure S4. Additional PPC data

(A-B) *Top*: Raw PPC values calculated for clusters recorded in the superficial (A) and (B) input layers in hit and miss trials, averaged into three frequency bands, 3-12 Hz, 15-25 Hz, and 30-80 Hz. PPC was calculated using the LFP recorded on the same channel as the spikes. *Bottom*: Bootstrapped estimation of the paired mean difference in PPC across hit and miss trials for each frequency band. Note that although there appears to be a difference in high-frequency PPC in the superficial layer, this population does not have significantly positive PPC in either condition, indicating that there is no phase-locking in either hits or misses. (C) Raw PPC values for neurons recorded in the deep layer in hit and miss trials, averaged into the same 3 frequency bands. Related to Figure 5B.
